# Supplementary material for: CAT: a computational anatomy toolbox for the analysis of structural MRI data
Source: PubMed Central journal article supplement (PMC11299546; doi:10.1093/gigascience/giae049), 2024-08-05
Supplement: giae049_giga-d-24-00078_revision_3.pdf [file giae049_giga-d-24-00078_revision_3.pdf]

|                                                      |                                                                                                                                                                                                                                                                                                                                                                                                                                                                                                                                                                                                                                                                                                                                                                                                                                                                                                                                                                                                                                                                                                               |                     |
|------------------------------------------------------|---------------------------------------------------------------------------------------------------------------------------------------------------------------------------------------------------------------------------------------------------------------------------------------------------------------------------------------------------------------------------------------------------------------------------------------------------------------------------------------------------------------------------------------------------------------------------------------------------------------------------------------------------------------------------------------------------------------------------------------------------------------------------------------------------------------------------------------------------------------------------------------------------------------------------------------------------------------------------------------------------------------------------------------------------------------------------------------------------------------|---------------------|
| <b>Manuscript Number:</b>                            | GIGA-D-24-00078R3                                                                                                                                                                                                                                                                                                                                                                                                                                                                                                                                                                                                                                                                                                                                                                                                                                                                                                                                                                                                                                                                                             |                     |
| <b>Full Title:</b>                                   | CAT – A Computational Anatomy Toolbox for the Analysis of Structural MRI Data                                                                                                                                                                                                                                                                                                                                                                                                                                                                                                                                                                                                                                                                                                                                                                                                                                                                                                                                                                                                                                 |                     |
| <b>Article Type:</b>                                 | Technical Note                                                                                                                                                                                                                                                                                                                                                                                                                                                                                                                                                                                                                                                                                                                                                                                                                                                                                                                                                                                                                                                                                                |                     |
| <b>Funding Information:</b>                          | Royal Society Te Apārangi<br>(20-UOA-045)                                                                                                                                                                                                                                                                                                                                                                                                                                                                                                                                                                                                                                                                                                                                                                                                                                                                                                                                                                                                                                                                     | Dr. Eileen Luders   |
|                                                      | Bundesministerium für Bildung,<br>Wissenschaft, Forschung und<br>Technologie<br>(ERAPERMED2021-127)                                                                                                                                                                                                                                                                                                                                                                                                                                                                                                                                                                                                                                                                                                                                                                                                                                                                                                                                                                                                           | Dr. Christian Gaser |
|                                                      | H2020 Marie Skłodowska-Curie Actions<br>(SmartAge 859890)                                                                                                                                                                                                                                                                                                                                                                                                                                                                                                                                                                                                                                                                                                                                                                                                                                                                                                                                                                                                                                                     | Dr. Christian Gaser |
|                                                      | Carl-Zeiss-Stiftung<br>(P2019-01-006)                                                                                                                                                                                                                                                                                                                                                                                                                                                                                                                                                                                                                                                                                                                                                                                                                                                                                                                                                                                                                                                                         | Dr. Christian Gaser |
|                                                      | Alexander von Humboldt-Stiftung                                                                                                                                                                                                                                                                                                                                                                                                                                                                                                                                                                                                                                                                                                                                                                                                                                                                                                                                                                                                                                                                               | Dr. Eileen Luders   |
|                                                      | Eunice Kennedy Shriver National Institute<br>of Child Health and Human Development<br>(R01HD081720)                                                                                                                                                                                                                                                                                                                                                                                                                                                                                                                                                                                                                                                                                                                                                                                                                                                                                                                                                                                                           | Dr. Eileen Luders   |
| <b>Abstract:</b>                                     | <p>A large range of sophisticated brain image analysis tools have been developed by the neuroscience community, greatly advancing the field of human brain mapping. Here we introduce the Computational Anatomy Toolbox (CAT) – a powerful suite of tools for brain morphometric analyses with an intuitive graphical user interface, but also usable as a shell script. CAT is suitable for beginners, casual users, experts, and developers alike providing a comprehensive set of analysis options, workflows, and integrated pipelines. The available analysis streams – illustrated on an example dataset – allow for voxel-based, surface-based, as well as region-based morphometric analyses. Notably, CAT incorporates multiple quality control options and covers the entire analysis workflow, including the preprocessing of cross-sectional and longitudinal data, statistical analysis, and the visualization of results. The overarching aim of this article is to provide a complete description and evaluation of CAT, while offering a citable standard for the neuroscience community.</p> |                     |
| <b>Corresponding Author:</b>                         | Christian Gaser<br>Jena University Hospital: Universitätsklinikum Jena<br>Jena, GERMANY                                                                                                                                                                                                                                                                                                                                                                                                                                                                                                                                                                                                                                                                                                                                                                                                                                                                                                                                                                                                                       |                     |
| <b>Corresponding Author Secondary Information:</b>   |                                                                                                                                                                                                                                                                                                                                                                                                                                                                                                                                                                                                                                                                                                                                                                                                                                                                                                                                                                                                                                                                                                               |                     |
| <b>Corresponding Author's Institution:</b>           | Jena University Hospital: Universitätsklinikum Jena                                                                                                                                                                                                                                                                                                                                                                                                                                                                                                                                                                                                                                                                                                                                                                                                                                                                                                                                                                                                                                                           |                     |
| <b>Corresponding Author's Secondary Institution:</b> |                                                                                                                                                                                                                                                                                                                                                                                                                                                                                                                                                                                                                                                                                                                                                                                                                                                                                                                                                                                                                                                                                                               |                     |
| <b>First Author:</b>                                 | Christian Gaser                                                                                                                                                                                                                                                                                                                                                                                                                                                                                                                                                                                                                                                                                                                                                                                                                                                                                                                                                                                                                                                                                               |                     |
| <b>First Author Secondary Information:</b>           |                                                                                                                                                                                                                                                                                                                                                                                                                                                                                                                                                                                                                                                                                                                                                                                                                                                                                                                                                                                                                                                                                                               |                     |
| <b>Order of Authors:</b>                             | Christian Gaser                                                                                                                                                                                                                                                                                                                                                                                                                                                                                                                                                                                                                                                                                                                                                                                                                                                                                                                                                                                                                                                                                               |                     |
|                                                      | Robert Dahnke                                                                                                                                                                                                                                                                                                                                                                                                                                                                                                                                                                                                                                                                                                                                                                                                                                                                                                                                                                                                                                                                                                 |                     |
|                                                      | Paul M. Thompson                                                                                                                                                                                                                                                                                                                                                                                                                                                                                                                                                                                                                                                                                                                                                                                                                                                                                                                                                                                                                                                                                              |                     |
|                                                      | Florian Kurth                                                                                                                                                                                                                                                                                                                                                                                                                                                                                                                                                                                                                                                                                                                                                                                                                                                                                                                                                                                                                                                                                                 |                     |
|                                                      | Eileen Luders                                                                                                                                                                                                                                                                                                                                                                                                                                                                                                                                                                                                                                                                                                                                                                                                                                                                                                                                                                                                                                                                                                 |                     |
| <b>Order of Authors Secondary Information:</b>       |                                                                                                                                                                                                                                                                                                                                                                                                                                                                                                                                                                                                                                                                                                                                                                                                                                                                                                                                                                                                                                                                                                               |                     |
| <b>Response to Reviewers:</b>                        | I hope that we have now everything included from your requests.                                                                                                                                                                                                                                                                                                                                                                                                                                                                                                                                                                                                                                                                                                                                                                                                                                                                                                                                                                                                                                               |                     |

| Additional Information:                                                                                                                                                                                                                                                                                                                                                                                                                                                                                                             |          |
|-------------------------------------------------------------------------------------------------------------------------------------------------------------------------------------------------------------------------------------------------------------------------------------------------------------------------------------------------------------------------------------------------------------------------------------------------------------------------------------------------------------------------------------|----------|
| Question                                                                                                                                                                                                                                                                                                                                                                                                                                                                                                                            | Response |
| Are you submitting this manuscript to a special series or article collection?                                                                                                                                                                                                                                                                                                                                                                                                                                                       | No       |
| <p><b>Experimental design and statistics</b></p> <p>Full details of the experimental design and statistical methods used should be given in the Methods section, as detailed in our <a href="#">Minimum Standards Reporting Checklist</a>. Information essential to interpreting the data presented should be made available in the figure legends.</p> <p>Have you included all the information requested in your manuscript?</p>                                                                                                  | Yes      |
| <p><b>Resources</b></p> <p>A description of all resources used, including antibodies, cell lines, animals and software tools, with enough information to allow them to be uniquely identified, should be included in the Methods section. Authors are strongly encouraged to cite <a href="#">Research Resource Identifiers</a> (RRIDs) for antibodies, model organisms and tools, where possible.</p> <p>Have you included the information requested as detailed in our <a href="#">Minimum Standards Reporting Checklist</a>?</p> | Yes      |
| <p><b>Availability of data and materials</b></p> <p>All datasets and code on which the conclusions of the paper rely must be either included in your submission or deposited in <a href="#">publicly available repositories</a> (where available and ethically appropriate), referencing such data using a unique identifier in the references and in the “Availability of Data and Materials” section of your manuscript.</p>                                                                                                      | Yes      |

Have you have met the above requirement as detailed in our [Minimum Standards Reporting Checklist](#)?

*Title of the paper:*  
**CAT – A Computational Anatomy Toolbox for the  
Analysis of Structural MRI Data**

*Names and institutions of all authors:*

**Christian Gaser<sup>a,b,c\*</sup>, Robert Dahnke<sup>a,b,c</sup>, Paul M Thompson<sup>d</sup>, Florian Kurth<sup>e,f,†</sup>, Eileen Luders<sup>e,g,h,i,†</sup>, and the Alzheimer's Disease Neuroimaging Initiative<sup>1</sup>**

<sup>a</sup>Department of Psychiatry and Psychotherapy, Jena University Hospital, Jena, Germany

<sup>b</sup>Department of Neurology, Jena University Hospital, Jena, Germany

<sup>c</sup>German Center for Mental Health (DZPG)

<sup>d</sup>Imaging Genetics Center, Stevens Neuroimaging & Informatics Institute, Keck School of Medicine, University of Southern California, Los Angeles, CA, USA

<sup>e</sup>School of Psychology, University of Auckland, Auckland, New Zealand

<sup>f</sup>Departments of Neuroradiology and Radiology, Jena University Hospital, Jena, Germany

<sup>g</sup>Department of Women's and Children's Health, Uppsala University, Uppsala, Sweden

<sup>h</sup>Swedish Collegium for Advanced Study (SCAS), Uppsala, Sweden

<sup>i</sup>Laboratory of Neuro Imaging, School of Medicine, University of Southern California, Los Angeles, CA, USA

<sup>1</sup> Data used in preparation of this article were obtained from the Alzheimer's Disease Neuroimaging Initiative (ADNI) database ([adni.loni.usc.edu](http://adni.loni.usc.edu)). As such, the investigators within the ADNI contributed to the design and implementation of ADNI and/or provided data but most did not participate in analysis or writing of this report. A complete listing of ADNI investigators can be found at: [http://adni.loni.usc.edu/wp-content/uploads/how\\_to\\_apply/ADNI\\_Acknowledgement\\_List.pdf](http://adni.loni.usc.edu/wp-content/uploads/how_to_apply/ADNI_Acknowledgement_List.pdf)

<sup>†</sup>*Shared last authorship*

*\*Correspondence should be addressed to:*

**Christian Gaser, Ph.D.**

Structural Brain Mapping Group

Department of Neurology, Jena University Hospital

Am Klinikum 1, D-07747 Jena, Germany

Phone: +49-3641-9325778 | Fax: ++49-3641-9325772 | E-mail: [christian.gaser@uni-jena.de](mailto:christian.gaser@uni-jena.de)

*Number of Words in Abstract:* **151**

*Number of Figures:* **6**

*Supplemental Material:* **7 figures, 2 tables, 7 notes**

**Keywords:** brain, computational anatomy, longitudinal, morphometry, SPM12, CAT12, MRI, ROI, VBM, cortical thickness, cortical surface, cortical folding, Alzheimer's disease

## **Abstract**

A large range of sophisticated brain image analysis tools have been developed by the neuroscience community, greatly advancing the field of human brain mapping. Here we introduce the *Computational Anatomy Toolbox* (CAT) – a powerful suite of tools for brain morphometric analyses with an intuitive graphical user interface, but also usable as a shell script. CAT is suitable for beginners, casual users, experts, and developers alike providing a comprehensive set of analysis options, workflows, and integrated pipelines. The available analysis streams – illustrated on an example dataset – allow for voxel-based, surface-based, as well as region-based morphometric analyses. Notably, CAT incorporates multiple quality control options and covers the entire analysis workflow, including the preprocessing of cross-sectional and longitudinal data, statistical analysis, and the visualization of results. The overarching aim of this article is to provide a complete description and evaluation of CAT, while offering a citable standard for the neuroscience community.

## **Significance Statement**

The Computational Anatomy Toolbox (CAT) marks a significant advancement in brain imaging analysis, providing an accessible yet sophisticated suite of brain morphometric analysis tools. Designed for a wide range of users, from novice to expert, CAT combines an intuitive graphical interface with powerful scripting capabilities. Its comprehensive analysis options, which include voxel-based, surface-based and region-based methods, are complemented by extensive quality control features. Uniquely, CAT supports the entire workflow from preprocessing to visualization of both cross-sectional and longitudinal data. Significantly, CAT's superior performance in processing speed and sensitivity in detecting neuroimaging effects, even under varying noise levels, positions it as a central tool for advancing the field of neuroscience.

## **Main**

The study of the human brain using neuroimaging methods is still in its infancy, but rapid technical advances in image acquisition and processing are enabling ever more refined characterizations of its micro- and macro-structure. Enormous efforts, for example, have been made to map differences between groups (e.g., young vs. old, diseased vs. healthy, male vs. female), to capture changes over time (e.g., from infancy to old age, in the framework of neuroplasticity, as a result of a clinical intervention), or to assess correlations of brain attributes (e.g., measures of length, volume, shape) with behavioral, cognitive, or clinical parameters. Popular neuroimaging software packages include tools for analysis and visualization, such as SPM (RRID:SCR\_007037) [1], FreeSurfer (RRID:SCR\_001847) [2], the Human Connectome Workbench [3], FSL (RRID:SCR\_002823) [4], BrainVISA [5], CIVET [6], or the LONI tools [7], just to name a few.

SPM (short for *Statistical Parametric Mapping*) is one of the most frequently used software packages, which works with Matlab (RRID:SCR\_001622) as well as Octave. Its library of accessible and editable scripts provides an ideal basis to extend the repertoire of preprocessing and analysis options. Over the years, SPM has inspired developers to create powerful tools that use SPM's functionality and interface [8]. These tools are more than just extensions of SPM offering a comprehensive range of cutting-edge options across the whole analysis spectrum, from the initial data processing to the final visualization of the statistical effects.

One such tool is CAT (short for *Computational Anatomy Toolbox*; [9]). CAT constitutes a significant step forward in the field of human brain mapping by adding sophisticated methods to process and analyze structural brain MRI data using voxel-, surface-, and region-based approaches. CAT is available as a collection of accessible scripts, with an intuitive user interface, and uses the same batch editor as SPM, which allows for a seamless integration with SPM workflows and other toolboxes, such as Brainstorm [10] and ExploreASL [11]. Not only does this enable beginners and experts to run complex state-of-the-art structural image analyses within the SPM environment, it will also provide advanced users as well as developers the much-appreciated option to incorporate a wide range of functions in their own customized workflows and pipelines.

## **Results**

### **Concept of CAT**

CAT12 is the current version of the CAT software and runs in Matlab (Mathworks, Natick, MA) or as a standalone version with no need for a Matlab license. It was originally designed

to work with SPM12 [12] and is compatible with Matlab versions 7.4 (R2007a) and later. No additional software or toolbox is required. The latest version of CAT can be downloaded here: [9]. The pre-compiled standalone version for Windows, Mac, or Linux operating systems can be downloaded here: [13]. All steps necessary to install and run CAT are documented in the user manual [14] and in the complementary online help, which can be accessed directly via CAT's help functions. The CAT software is free but copyrighted and distributed under the terms of the GNU General Public License, as published by the Free Software Foundation.

CAT can be either started through SPM, from the Matlab command window, from a shell, or as a standalone version. Except when called from the command shell (CAT is fully scriptable), a user interface will appear (see **Figure 1**) allowing easy access to all analysis options and most additional functions. In addition, a graphical output window will display the interactive help to get started. This interactive help will be replaced by the results of the analyses (i.e., in that same window), but can always be called again via the user interface.



— Figure 1 (GUI) —

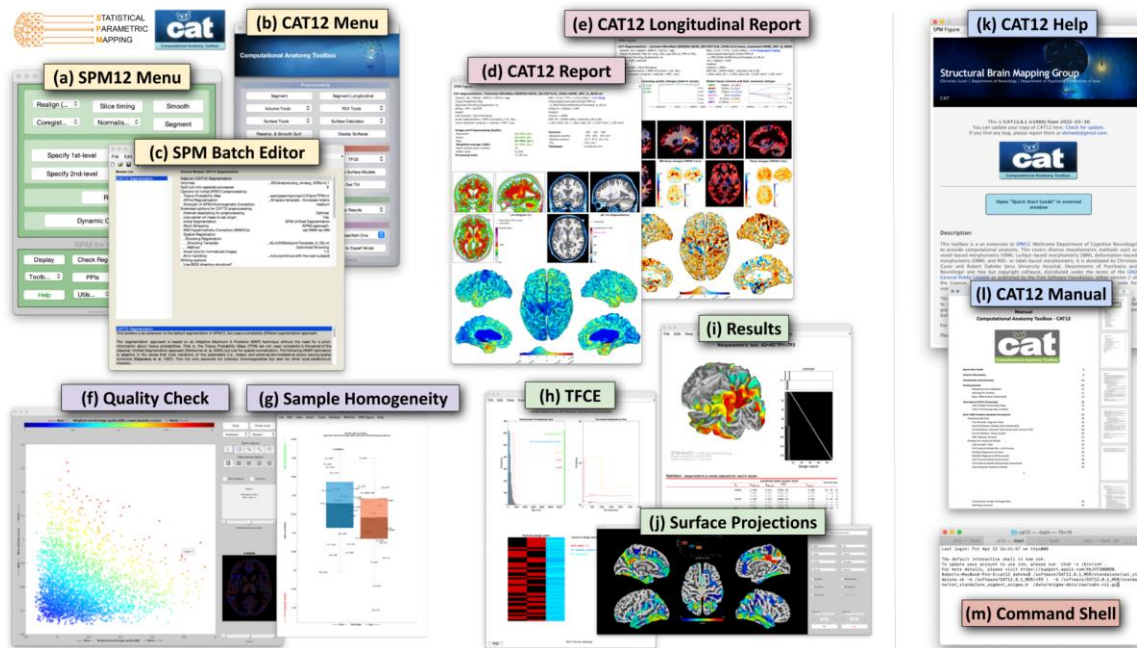

**Figure 1:** Elements of the graphical user interface.

The SPM menu (a) and CAT menu (b) allow access to the (c) SPM batch editor to control and combine a variety of functions. At the end of the processing stream, cross-sectional and longitudinal outputs are summarized in a brain-specific one-page report (d, e). In addition, CAT provides options to check image quality (f) and sample homogeneity (g) to allow outliers to be removed before applying the final statistical analysis, including *threshold-free cluster enhancement* – TFCE (h); the numerical and graphical output can then be retrieved (i), including surface projections (j). For beginners, there is an interactive help (k) as well as a user manual (l). For experts, command line tools (m) are available under Linux and MacOS.

## Computational Morphometry

CAT’s processing pipeline (see **Figure 2**) contains two main streams: (1) voxel-based processing for *voxel-based morphometry* (VBM) and (2) surface-based processing for *surface-based morphometry* (SBM). The former is a prerequisite for the latter, but not the other way round. Both processing streams can be extended to include additional steps for (3) region-based processing and *region-based morphometry* (RBM).

— Figure 2 (main processing pipelines) —

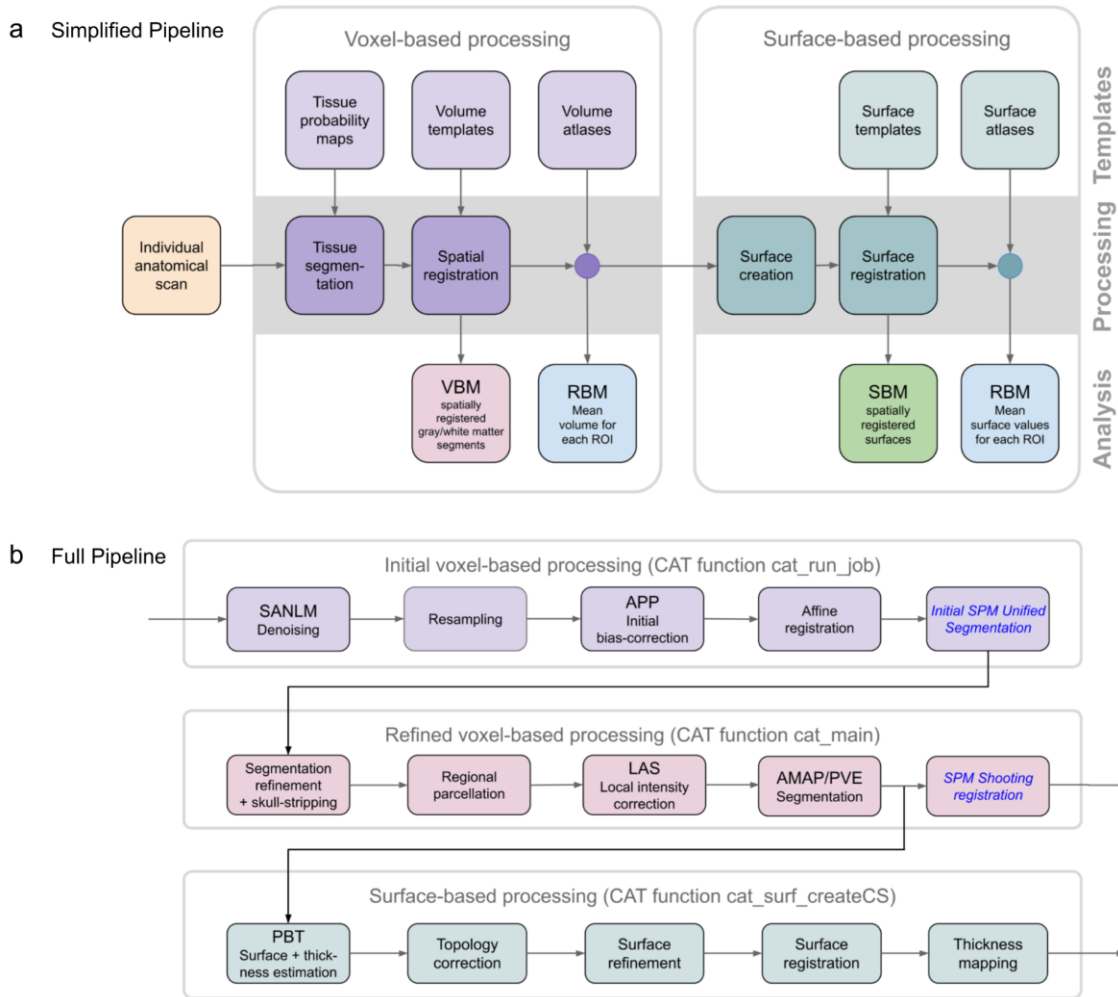

**Figure 2:** Main processing streams

(a) Simplified pipeline: Image processing in CAT can be separated into a mandatory voxel-based processing stream and an optional subsequent surface-based processing stream. Each stream requires different templates and atlases and, in addition, tissue probability maps for the voxel-based stream. The voxel-based stream consists of two main modules – for tissue segmentation and spatial registration – resulting in spatially registered (and modulated) gray matter / white matter segments, which provides the basis for *voxel-based morphometry* (VBM). The surface-based stream also consists of two main modules – for surface creation and registration – resulting in spatially registered surface maps, which provide the basis for *surface-based morphometry* (SBM). Both streams also include an optional module each to analyze *regions of interest* (ROIs) resulting in ROI-specific mean volumes (mean surface values, respectively). This provides the basis for *region-based morphometry* (RBM).

(b) Detailed pipeline: To illustrate the differences from SPM, the CAT pipeline is detailed with its individual processing steps. The SPM methods used are shown in blue and italic font: images are first denoised by a spatially adaptive non-local means (SANLM) filter [15] and resampled to an isotropic voxel size. After applying an initial bias correction to facilitate the affine registration, SPM’s unified segmentation [16] is used for the skull stripping and as a starting estimate for the adaptive maximum *a posteriori* (AMAP) segmentation [17] with partial volume estimation (PVE) [18]. In addition, SPM’s segmentation is used to locally correct

image intensities. Finally, the outcomes of the AMAP segmentation are registered to the MNI template using SPM's shooting registration.

The outcomes of the AMAP segmentation are also used to estimate cortical thickness and the central surface using a projection-based thickness (PBT) method [19]. More specifically, after repairing topology defects [20] central, pial and white matter surface meshes are generated. The individual left and right central surfaces are then registered to the corresponding hemisphere of the FreeSurfer template using a 2D version of the DARTEL approach [21]. In the final step, the pial and white matter surfaces are used to refine the initial cortical thickness estimate using the FreeSurfer thickness metric [22,23].

### *Voxel-based Processing*

Voxel-based processing steps can be roughly divided into a module for tissue segmentation, followed by a module for spatial registration.

- **Tissue Segmentation:** The process is initiated by applying a *spatially adaptive non-local means* (SANLM) denoising filter [15], followed by SPM's standard *unified segmentation* [16]. The resulting output serves as a starting point for further optimizations and CAT's tissue segmentation steps: first, the brain is parcellated into the left and right hemispheres, subcortical areas, ventricles, and cerebellum. In addition, local white matter hyperintensities are detected (to be later accounted for during the spatial registration and the optional surface processing). Second, a local intensity transformation is performed to reduce the effects of higher gray matter intensities in the motor cortex, basal ganglia, and occipital lobe, which are influenced by varying degrees of myelination. Third, an *adaptive maximum a posteriori* (AMAP) segmentation is applied which does not require any *a priori* information on the tissue probabilities [17]. The AMAP segmentation also includes a *partial volume estimation* [18]. **Figure 3a** provides information on the accuracy of CAT's tissue segmentation.
- **Spatial Registration:** Geodesic Shooting [24] is used to register the individual tissue segments to standardized templates in the ICBM 2009c Nonlinear Asymmetric space

(*MNI152NLin2009cAsym*; [25], hereafter referred to as MNI space. While MNI space is also used in many other software packages, enabling cross-study comparisons, users may also choose to use their own templates. **Figure 3b** provides information on the accuracy of CAT's spatial registration.

### *Voxel-based Morphometry (VBM)*

VBM is applied to investigate the volume (or local amount) of a specific tissue compartment [16,26] - usually gray matter. VBM incorporates different processing steps: (a) tissue segmentation and (b) spatial registration as detailed above, and in addition (c) adjustments for volume changes due to the registration (modulation) as well as (d) convolution with a 3D Gaussian kernel (spatial smoothing). As a side note, the modulation step results in voxel-wise gray matter volumes that are the same as in native space (i.e., before spatial registration) and not corrected for brain size yet. To remove effects of brain size, users have at least two options: (1) calculating the *total intracranial volume* (TIV) and including TIV as a covariate in the statistical model [27] or (2) selecting 'global scaling' (see second level options in SPM). The latter is recommended if TIV is linked with (i.e., not orthogonal to) the effect of interest (e.g., sex), which can be tested (see 'Design orthogonality' in SPM).

### *Surface-based Processing*

The optional surface-based processing comprises a series of steps that can be roughly divided into a module for surface creation, followed by a module for surface registration.

- **Surface Creation:** **Figure 3** illustrates the surface creation step in CAT for data obtained on scanners with different field strengths (1.5, 3.0, and 7.0 Tesla). CAT uses

a projection-based thickness method [19] which estimates the initial cortical thickness and initial central surface in a combined step, while handling partial volume information, sulcal blurring, and sulcal asymmetries, without explicit sulcus reconstruction. After this initial step, topological defects (i.e., anatomically incorrect connections between gyri or sulci) are repaired using spherical harmonics [20]. The topological correction is followed by a surface refinement, which results in the final central, pial and white surface meshes. In the last step, the final pial and white matter surfaces are used to refine the initial cortical thickness estimate using the FreeSurfer thickness metric [22,23]. Alternatively, the final central surface can be used to calculate metrics of cortical folding, as described under **Surface-based Morphometry**.

- **Surface Registration:** The resulting individual central surfaces are registered to the corresponding hemisphere of the FreeSurfer *FsAverage* template [28]. During this process, the individual central surfaces are spherically inflated with minimal distortions [29] and a one-to-one mapping between the folding patterns of the individual and template spheres is created by a 2D-version of the DARTEL approach [21,30]. **Figure 3d** provides information on the accuracy of CAT's surface registration.

— Figure 3 (processing accuracy / consistency) —

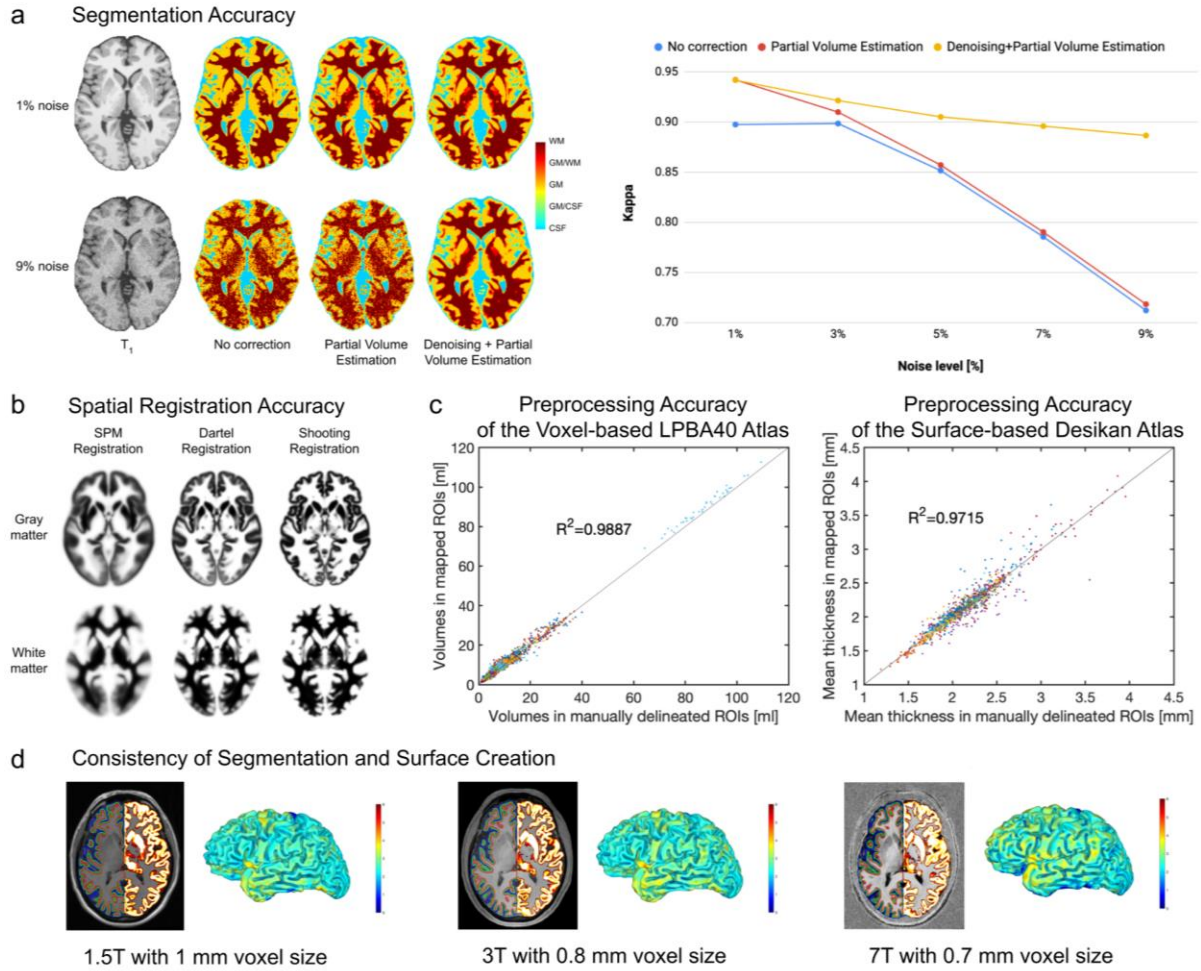

**Figure 3:** Evaluation of segmentation and registration accuracy

(a) *Segmentation Accuracy:* Most approaches for brain segmentation assume that each voxel belongs to a particular tissue class, such as *gray matter* (GM), *white matter* (WM), or *cerebrospinal fluid* (CSF). However, the spatial resolution of brain images is limited, leading to so-called *partial volume effects* (PVE) in voxels containing a mixture of different tissue types, such as GM/WM and GM/CSF. As PVE approaches are highly susceptible to noise, we combined the PVE model [18] with a spatial adaptive non-local means denoising filter [15]. To validate our method, we used a ground truth image from the BrainWeb [31] database with varying noise levels of 1-9%. The segmentation accuracy for all tissue types (GM, WM, CSF) was determined by calculating a *kappa* coefficient (a kappa coefficient of 1 means that there is perfect correspondence between the segmentation result and the ground truth). *Left panel:* The effect of the PVE model and the denoising filter on the tissue segmentation at the extremes of 1% and 9% noise. *Right panel:* The kappa coefficient over the range of different noise levels. Both panels demonstrate the advantage of combining the PVE model with a spatial adaptive non-local means denoising filter, with particularly strong benefits for noisy data.

(b) *Registration Accuracy:* To ensure an appropriate overlap of corresponding anatomical regions across brains, high-dimensional nonlinear spatial registration is required. CAT uses a sophisticated Shooting approach [24], together with an average template created from the IXI dataset [32]. The figure shows the improved accuracy

(i.e., a more detailed average image) when spatially registering 555 brains using the so-called ‘shooting’ registration and the Dartel registration compared to the SPM standard registration.

(c) *Preprocessing Accuracy*: We validated the performance of *region-based morphometry* (RBM) in CAT by comparing measures derived from automatically extracted *regions of interest* (ROI) versus manually labeled ROIs. For the voxel-based analysis, we used 56 structures, manually labeled in 40 brains that provided the basis for the LPBA40 atlas [33]. The gray matter volumes from those manually labeled regions served as the ground truth against which the gray matter volumes calculated using CAT and the LPBA40 atlas were then compared. For the surface-based analysis, we used 34 structures that were manually labeled in 39 brains according to Desikan [34]. The mean cortical thickness from those manually labeled regions served as the ground truth against which the mean cortical thickness calculated using CAT and the Desikan atlas were compared. The diagrams show excellent overlap between manually and automatically labeled regions in both voxel-based (left) and surface-based (right) analyses.

(d) *Consistency of Segmentation and Surface Creation*: Data from the same brain were acquired on MRI scanners with different isotropic spatial resolutions and different field strengths: 1.5T MPRAGE with 1 mm voxel size; 3T MPRAGE with 0.8 mm voxel size; and 7T MP2RAGE with 0.7 mm voxel size. *Section views*: The left hemispheres depict the central (*green*), pial (*blue*), and white matter (*red*) surfaces; the right hemispheres show the gray matter segments. *Rendered Views*: The color bar encodes point-wise cortical thickness projected onto the left hemisphere central surface. Both section views and hemisphere renderings demonstrate the consistency of the outcomes of the segmentation and surface creation procedures across different spatial resolutions and field strengths.

### *Surface-based Morphometry (SBM)*

SBM can be used to investigate cortical thickness or various parameters of cortical folding. The measurement of ‘cortical thickness’ captures the width of the gray matter ribbon as the distance between its inner and outer boundary at thousands of points (see **Figure 4**). To obtain measurements of ‘cortical folding’ the user has a variety of options in CAT, ranging from *Gyrification* [35] to *Sulcal Depth* (van Essen, 2005) to *Cortical Complexity* [37] to the *Surface Ratio* [38], as explained and illustrated in **Figure 4**. Similar to VBM, SBM incorporates a series of different steps: (a) surface creation and (b) surface registration as detailed above, and (c) spatial smoothing. As a side note, since the measurements in native space are mapped directly to the template during the spatial registration, no additional modulation (as in VBM) is needed to preserve the individual differences. In contrast to VBM, SBM does not require brain size corrections because cortical thickness and cortical folding are not closely associated with total brain volume (unlike gray matter volume) [39].

— **Figure 4 (cortical measures)** —

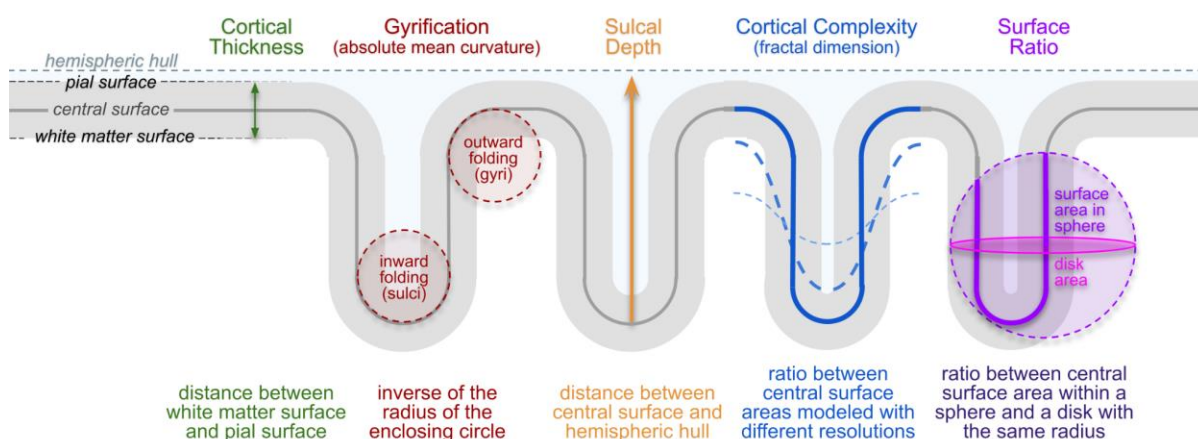

**Figure 4:** Cortical Measurements

Surface-based morphometry is applied to investigate cortical surface features (i.e., cortical thickness and various parameters of cortical folding) at thousands of surface points. *Cortical Thickness*: One of the best known and most frequently used morphometric measures is cortical thickness, which captures the width of the gray matter ribbon as the distance between its inner boundary (white matter surface) and outer boundary (pial surface). *Cortical Folding*: CAT provides distinct cortical folding measures, derived from the geometry of the central surface: ‘Gyrfication’ is calculated via the absolute mean curvature [35] of the central surface. ‘Sulcal Depth’ is calculated as the distance from the central surface to the enclosing hull (van Essen, 2005). ‘Cortical Complexity’ is calculated using the fractal dimension of the central surface area from spherical harmonic reconstructions [37]. Finally, ‘Surface Ratio’ is calculated as the ratio between the area of the central surface contained in a sphere of a defined size and that of a disk with the same radius [38].

### *Region-based Processing and Morphometry*

In addition to voxel- or point-wise analyses via VBM or SBM, CAT provides an option to conduct regional analyses via *region-based morphometry* (RBM). For this purpose, the processing steps under voxel-based processing (surface-based processing, respectively) should be applied and followed by automatically calculating regional measurements. This is achieved by working with regions of interest (ROIs), defined using standardized atlases. The required atlases are provided in CAT (see **Supplemental Table 1** and **Supplemental Table 2**), but users can also work with their own atlases.



- **Voxel-based ROIs:** The volumetric atlases available in CAT have been defined on brain templates in MNI space and may be mapped to the individual brains by using the spatial registration parameters determined during voxel-based processing. Volumetric measures, such as regional gray matter volume, can then be calculated for each ROI in native space.
- **Surface-based ROIs:** The surface atlases available in CAT are supplied on the *FsAverage* surface and can be mapped to the individual surfaces by using the spherical registration parameters determined during the surface-based processing. Surface-based measures, such as cortical thickness or cortical folding, are then calculated for each ROI in native space.

## Performance of CAT

CAT allows processing streams to be distributed to multiple processing cores, to reduce processing time. For example, CAT's analysis of 50 subjects (see **Example Application**) leveraging the inbuilt parallel processing capabilities on four cores, required seven hours processing time when analyzing one image per subject (cross-sectional stream), and 18 hours when processing three images per subject (longitudinal stream) for the entire sample.

Application of all available workflows for a single T1-weighted image takes around 35 minutes, as timed on an iMac with Intel Core i7 with 4 GHz and 32 GB RAM using Matlab version 2017b, SPM12 version r7771, and CAT12.8 version r1945.

CAT's performance has been thoroughly tested by evaluating its accuracy, sensitivity and robustness in comparison to other tools frequently used in the neuroimaging community. For this purpose, we applied CAT and analyzed real data (see **Example Application**) as well

as simulated data generated from BrainWeb [40]. The evaluation procedures are detailed in **Supplemental Note 1** and **Supplemental Note 2**; the outcomes are presented in **Supplemental Figure 1** and **Supplemental Figure 2**. CAT proved to be accurate, sensitive, reliable, and robust outperforming other common neuroimaging tools.

## Five Selected Features of CAT

### *1. Longitudinal Processing*

Aside from offering a standard pipeline for cross-sectional analyses, CAT has specific longitudinal pipelines that ensure a local comparability both across subjects and across time points within subjects. Compared to the cross-sectional pipeline, these longitudinal pipelines render analysis outcomes more accurate when mapping structural changes over time. The user can choose between three different longitudinal pipelines: the first one for analyzing brain plasticity (over days, weeks, months); the second one for analyzing brain development (over months and years); and the third one for brain aging (over months, years, decades). For more details, refer to **Supplemental Note 3**.

### *2. Quality Control*

CAT introduces a retrospective quality control framework for the empirical quantification of essential image parameters, such as noise, intensity inhomogeneities, and image resolution (all of these can be impacted, for example, by motion artifacts). Separate parameter-specific ratings are provided as well as a handy overall rating [41]. Moreover, image outliers can be easily identified, either directly based on the aforementioned indicators of the image quality

or by calculating a Z-score determined by the quality of the image processing as well as by the anatomical characteristics of each brain. For more details, refer to **Supplemental Note 4**.

### *3. Mapping onto the Cortical Surface*

CAT allows the user to map voxel-based values (e.g., quantitative, functional, or diffusion parameters) to individual brain surfaces (i.e., pial, central, and/or white matter) for surface-based analyses. The integrated equi-volume model [42] also considers the shift of cytoarchitectonic layers caused by the local folding. Optionally, CAT also allows mapping of voxel values at multiple positions along the surface normal at each node - supporting a layer-specific analysis of ultra-high resolution functional MRI data [43,44]. For more details, refer to **Supplemental Note 5**.

### *4. Threshold-free Cluster Enhancement (TFCE)*

CAT comes with its own TFCE toolbox and provides the option to apply TFCE [45] in any statistical *second-level* analysis in SPM, both for voxel-based and for surface-based analyses. It can also be employed to analyze *functional MRI* (fMRI) or *diffusion tensor imaging* (DTI) data. A particularly helpful feature of the TFCE toolbox is that it automatically recognizes exchangeability blocks and potential nuisance parameters [46] from an existing statistical design in SPM. For more details, refer to **Supplemental Note 4**.

### *5. Visualization*

CAT allows a user to generate graphs and images, which creates a solid basis to explore findings as well as to generate ready-to-publish figures according to prevailing standards.

More specifically, it includes two distinct sets of tools to visualize results: the first set prepares both voxel- and surface-based data for visualization by providing options for thresholding the default SPM  $T$ -maps or  $F$ -maps and for converting statistical parameters (e.g.,  $T$ -maps and  $F$ -maps into  $p$ -maps). The second set of tools visualizes the data offering the user ample options to select from different brain templates, views, slices, significance parameters, significance thresholds, color schemes, etc. (see **Figure 5**).

— **Figure 5 (visualization)** —

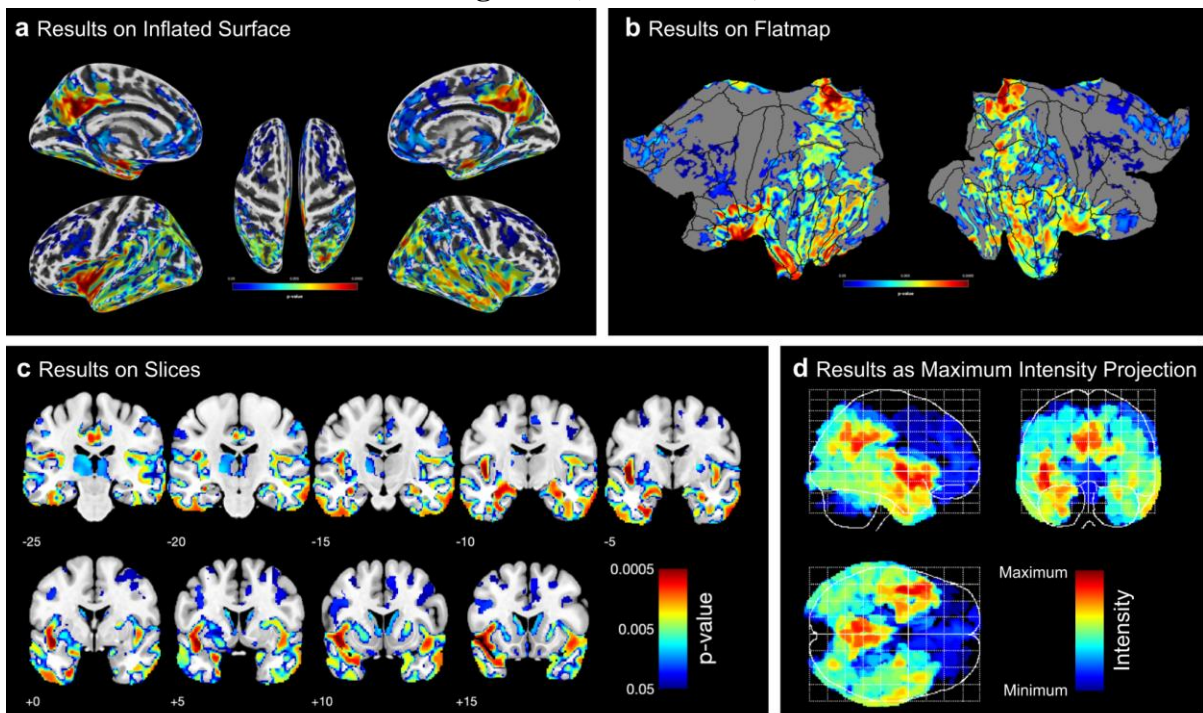

**Figure 5:** Examples of CAT’s visualization of results.

Both surface- and voxel-based data can be presented on surfaces such as (a) the (inflated) FsAverage surface, or (b) the flatmap of the Connectome Workbench. Volumetric maps can also be displayed as (c) slice overlays on the MNI average brain, or (d) as a maximum intensity projection (so-called “glass brains”). All panels show the corrected  $p$ -values from the longitudinal VBM study in our example (see Example Application).

## Example Application

To demonstrate an application of CAT, we investigated an actual dataset focusing on the effects of Alzheimer’s disease on brain structure. More specifically, we set out to compare 25 patients with Alzheimer’s disease and 25 matched controls. We applied (I) a VBM analysis focusing on voxel-wise gray matter volume, (II) an RBM analysis focusing on regional gray matter volume (i.e., a voxel-based ROI analysis), (III) a surface-based analysis focusing on point-wise cortical thickness, and (IV) an RBM analysis focusing on regional cortical thickness (i.e., a surface-based ROI analysis). Given the wealth of literature on Alzheimer’s disease, we expected atrophy in gray matter volume and cortical thickness in patients compared to controls, particularly in regions around the medial temporal lobe and the default mode network [47,48]. In addition to distinguishing between the four morphological measures (I-IV), all analyses were conducted using both cross-sectional and longitudinal streams in CAT. Overall, we expected that longitudinal changes would manifest in similar brain regions to cross-sectional group differences, but that cross-sectional effects would be more pronounced than longitudinal effects. The outcomes of this example analysis are presented and discussed in the next section.

## Discussion

### Example Application

As shown in **Figure 6**, all four cross-sectional streams – investigating voxel-based gray matter volume, regional gray matter volume, point-wise thickness, and regional thickness –

revealed widespread group differences between Alzheimer's disease (AD) patients and matched controls. Overall, the effects were comparable between cross-sectional and longitudinal streams, but the significant clusters were more pronounced cross-sectionally (note the different thresholds cross-sectionally and longitudinally).

More specifically, using VBM, significantly smaller voxel-wise gray matter volumes were observed in AD patients compared to controls, particularly in the medial and lateral temporal lobes and within regions of the default mode network (**Figure 6a top**). Similarly, the longitudinal follow-up revealed a significantly stronger gray matter volume loss in patients compared to controls, with effects located in the medial temporal lobe as well as the default mode network (**Figure 6a bottom**). The voxel-based ROI analysis resulted in a significance pattern similar to the VBM study, with particularly pronounced group differences in the temporal lobe that extended into additional brain areas including those comprising the default mode network (**Figure 6b top**). Again, the longitudinal analysis yielded similar but less pronounced findings than the cross-sectional analysis, although longitudinal effects were stronger than in the VBM analysis (**Figure 6b bottom**).

Using SBM, the point-wise cortical thickness analysis yielded a pattern similar to the VBM analysis with significantly thinner cortices in patients, particularly in the medial and lateral temporal lobe and within regions of the default mode network (**Figure 6c top**). Just as in the VBM analysis, significant clusters were widespread and reached far into adjacent regions. Again, the results from the longitudinal stream were less widespread and significant than the results from the cross-sectional stream (**Figure 6c bottom**). Finally, the surface-based ROI analysis largely replicated the local findings from the SBM analysis (**Figure 6d top / bottom**).

Overall, the results of all analysis streams corroborate prior findings in the Alzheimer's disease literature, particularly the strong disease effects within the medial temporal lobe and regions of the default mode network [47,48]. Furthermore, the comparable pattern across measures suggests a considerable consistency between available morphometric options, even if gray matter volume and cortical thickness are biologically different and not perfectly related [49,50].

### Evaluation of CAT12

As shown in **Supplemental Figure 1** and **Supplemental Figure 2**, CAT12 proved to be accurate, sensitive, reliable, and robust outperforming other common neuroimaging tools. Similar conclusions have been drawn in independent evaluations testing one or more software in comparison with CAT12. For example, Guo et al. [51] evaluated the repeatability and reproducibility of brain volume measurements using FreeSurfer, FSL-SIENAX and SPM, and highlighted the reliability of CAT12. Similarly, CAT12 emerged as a robust option when demonstrating that the choice of the processing pipeline influences the location of neuroanatomical brain markers [52]. Last but not least, Khlif et al. [53] compared the outcomes of CAT12's automated segmentation of the hippocampus with those achieved based on manual tracing and demonstrated that both approaches produced comparable hippocampal volume.

In addition, numerous evaluations suggest that CAT12 performs at least as well as other common neuroimaging tools and, as such, offers a valuable alternative. For example, Tavares et al. [54] conducted a VBM study and concluded that the segmentation pipelines implemented in CAT12 and SPM12 provided results that are highly correlated and that the choice of the pipeline had no impact on the accuracy of any brain volume measure. Along the

same lines, but for SBM, Ay et al. [55] reported that CAT12 and FreeSurfer produced equally valid results for parcel-based cortical thickness calculations. de Fátima Machado Dias et al. [56] addressed the issue of reproducibility and observed that cortical thickness measures using CAT12 and FreeSurfer were comparable at the individual level. Moreover, Seiger et al. [57] conducted a study in patients with Alzheimer's disease and healthy controls, in which CAT12 and FreeSurfer provided consistent cortical thickness estimates and excellent test-retest variability scores. Velázquez et al. [58] supported these findings when comparing CAT12 and FreeSurfer with three voxel-based methods in a test-retest analysis and clinical application. Finally, Righart et al. [59] compared volume and surface-based cortical thickness measurements in multiple sclerosis and emphasized CAT12's consistent performance.

These collective findings from multiple studies support the notion that CAT is a robust and reliable tool for both VBM and SBM analyses, producing results that are comparable to, and in some cases, superior to, other established neuroimaging software.

– **Figure 6 (example application)** –



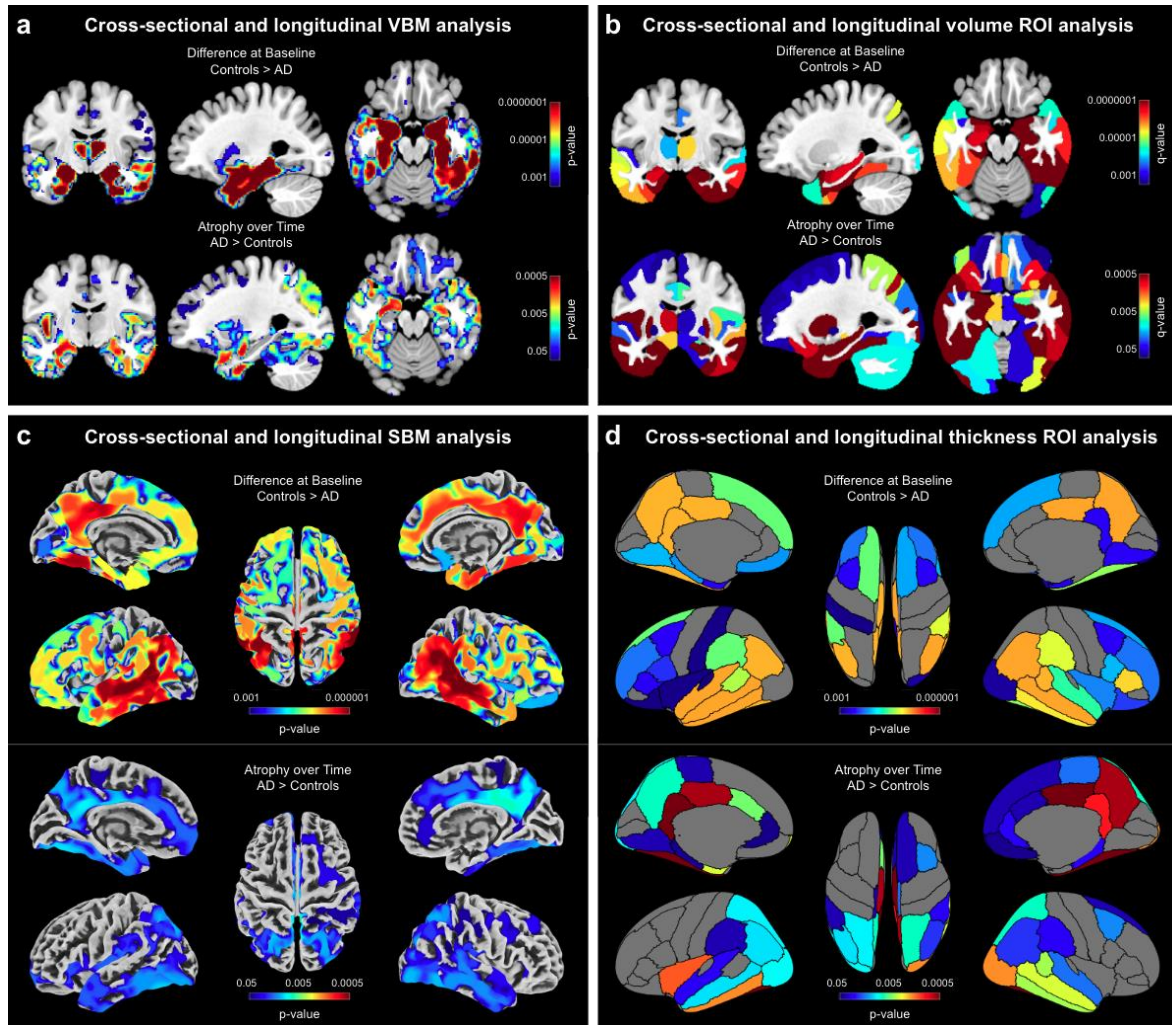

**Figure 6:** Pronounced atrophy in gray matter and cortical thickness in patients with Alzheimer's disease compared to healthy control subjects.

(a) *Voxel-based Morphometry* (VBM) findings: Results were estimated using *threshold-free cluster enhancement* (TFCE), corrected for multiple comparisons by controlling the *family-wise error* (FWE), and thresholded at  $p < 0.001$  for cross-sectional data and  $p < 0.05$  for longitudinal data. Significant findings were projected onto orthogonal sections intersecting at  $(x = -27\text{mm}, y = -10\text{mm}, z = -19\text{mm})$  of the mean brain created from the entire study sample ( $n = 50$ ).

(b) *Volumetric Regions of Interest* (ROI) findings: ROIs were defined using the Neuromorphometrics atlas. Results were corrected for multiple comparisons by controlling the *false discovery rate* (FDR) and thresholded at  $q < 0.001$  for cross-sectional data and  $q < 0.05$  for longitudinal data. Significant findings were projected onto the same orthogonal sections as for the VBM findings.

(c) *Surface-based Morphometry* (SBM) findings: Results were estimated using TFCE, FWE-corrected, and thresholded at  $p < 0.001$  for cross-sectional data and  $p < 0.05$  for longitudinal data. Significant findings were projected onto the FreeSurfer *FsAverage* surface.

(d) *Surface Regions of Interest* (ROI) findings: ROIs were defined using the DK40 atlas. Results were FDR-corrected and thresholded at  $q < 0.001$  for cross-sectional data and  $q < 0.05$  for longitudinal data. Significant findings were projected onto the *FsAverage* surface.

## Conclusion

CAT is suitable for desktop and laptop computers as well as high-performance clusters. It is fully integrated into the SPM environment within Matlab, but also allows process execution directly from the command shell, without having to start SPM. CAT can also run without a Matlab license by using the stand-alone version or by using Octave instead of Matlab. In terms of performance, CAT allows for ultra-fast processing and analysis and also is more sensitive in detecting significant effects compared to other common tools used by the neuroimaging community. Moreover, it better handles varying levels of noise and signal inhomogeneities. Furthermore, CAT is easy to integrate with non-SPM software packages and also supports the Brain Imaging Data Structure (BIDS) standards [60]. Therefore, CAT is ideally suited not only to process small datasets (as demonstrated in the example application), but also big datasets, such as samples of the UK Biobank [61] or ENIGMA [62]. Finally, while CAT is currently targeted at structural imaging data, some features (e.g., high-dimensional spatial registration or mapping onto the cortical surface) may also be used for the analysis of functional, diffusion, or quantitative MRI or EEG/MEG data.

## Methods

### Application Example

#### Data Source

Data for the application example were obtained from the Alzheimer's Disease Neuroimaging Initiative (ADNI) database [63]. The ADNI (RRID:SCR\_003007) was launched in 2003 as a

public-private partnership, led by Principal Investigator Michael W. Weiner, MD. The primary goal of ADNI has been to test whether serial magnetic resonance imaging (MRI), positron emission tomography (PET), other biological markers, and clinical and neuropsychological assessment can be combined to measure the progression of mild cognitive impairment (MCI) and early Alzheimer's disease (AD). For up-to-date information, see [64].

### Sample Characteristics

For the purpose of the current study, we compiled a sample of fifty subjects with 3D T1-weighted structural brain images from the ADNI database. Specifically, we randomly selected the first 25 subjects (16 males / 9 females) classified as AD patients (mean age  $75.74 \pm 8.14$  years; mean *minimal mental status examination* (MMSE) score:  $23.44 \pm 2.04$ ) and matched them for sex and age with 25 healthy controls (mean age  $76.29 \pm 3.90$  years; mean MMSE:  $28.96 \pm 1.24$ ). Informed consent was obtained from all research participants. All subjects had brain scans at baseline (first scan at enrolment) and at two follow-up visits, at one year and at two years after the first scan. All brain images were acquired on 1.5 Tesla scanners (Siemens, General Electric, Philips) using a 3D T1-weighted sequence with an in-plane resolution between 0.94 and 1.25 mm and a slice thickness of 1.2 mm.

### Data Processing

All T1-weighted data were processed using CAT12 following the cross-sectional (or longitudinal, respectively) processing stream for VBM, SBM (cortical thickness), and ROI analyses (see **Figure 2**) according to the descriptions provided under **Computational**

**Morphometry.** For each subject, only their first time point was included in the cross-sectional stream, whereas all three time points were included in the longitudinal stream. The processing streams for the VBM analysis resulted in modulated and registered gray matter segments, which were smoothed using a 6 mm Gaussian kernel. The image processing streams for the SBM analysis resulted in the registered point-wise cortical thickness measures, which were smoothed using a 12 mm Gaussian Kernel. The voxel-based ROI analysis used the Neuromorphometrics atlas (RRID:SCR\_005656) [65] to calculate the regional gray matter volumes; the surface-based ROI analysis employed the DK40 atlas [34] to calculate regional cortical thickness.

### Statistical Analysis

For each variable of interest – voxel-wise gray matter volume, regional gray matter volume, point-wise cortical thickness, and regional cortical thickness – the dependent measures (e.g., the registered, modulated, and smoothed gray matter segments for voxel-wise gray matter) were entered into the statistical model. For the cross-sectional stream, *group* (Alzheimer’s disease patients vs. controls) was defined as the independent variable. For the longitudinal stream, the interaction between *group* and *time* was defined as the independent variable, whereas *subject* was defined as a variable of no interest. For the VBM and the voxel-based ROI analyses, data were corrected for TIV using ‘global scaling’ (because TIV correlated with *group*, the effect of interest). Since cortical thickness does not scale with brain size [39], no corrections for TIV were applied for the SBM and the surface-based ROI analyses. For the cross-sectional analysis we additionally included age as a nuisance parameter.

For the VBM and SBM analyses, results were corrected for multiple comparisons by applying TFCE [45] and controlling the family-wise error at  $p \leq 0.001$  (cross-sectional) and  $p \leq 0.05$  (longitudinal). For the voxel-based and surface-based ROI analyses, results were corrected for multiple comparisons by controlling the false discovery rate [66] at  $q \leq 0.001$  (cross-sectional) and  $q \leq 0.05$  (longitudinal). All statistical tests were one-tailed given our a priori hypothesis that AD patients present with less gray matter at baseline and a larger loss of gray matter over time.

The outcomes of the VBM and voxel-based ROI analyses were overlaid onto orthogonal sections of the average brain that was created from the spatially registered T1-weighted images of the study sample ( $n=50$ ); the outcomes of the SBM and surface-based ROI analyses were projected onto the *FsAverage* surface.

## **Data Availability**

MRI data are available after obtaining approval to access ADNI data at [63]. The BrainWeb data is available at [40]. Snapshots of our code and other data further supporting this work are openly available in the GigaScience repository, GigaDB [68].

## **Source Code Availability and Requirements**

Project name: Computational Anatomy Toolbox

Project home page: [9,69]

Software documentation: [14]

Operating system(s): Platform independent (MacOS, Linux, Windows)

Programming language: Matlab, C

Other requirements: Matlab (7.4 or newer)

License: GPL 2.0

RRID: SCR\_019184

## Additional Files

**Supplemental Note 1.** Comparison with other tools

**Supplemental Note 2.** Evaluation with simulated data

**Supplemental Note 3.** Longitudinal Processing

**Supplemental Note 4.** Quality Control

**Supplemental Note 5.** Mapping onto the Cortical Surface

**Supplemental Note 6.** Threshold-free Cluster Enhancement (TFCE)

**Supplemental Note 7.** Customized Methods for Clinical Data

**Supplemental Figure 1.** Comparisons between CAT12 and other common tools. Here we compared the baseline gray matter images of 25 patients with Alzheimer's disease and 25 matched controls. *Panel a:* VBM analyses of voxel-wise gray matter volume using FSL-FAST6 (*top*), SPM12-Shooting (*middle*), and CAT12 (*bottom*). *Panel b:* SBM analyses of point-wise cortical thickness using CIVET2.1 (*top*), Freesurfer7.2 (*middle*), and CAT12 (*bottom*). Panels c and d: Sensitivity of VBM and SBM analyses. The effect sizes (Cohen's *d*) are shown on the *x*-axis; their frequency is shown on the *y*-axis (occurrence is normalized to one to facilitate comparisons between histograms). For both VBM and SBM, CAT12 demonstrates a larger sensitivity in detecting structural differences. This is reflected in the more extended significance clusters and lower *p*-values (*panels a and b*) as well as larger effect sizes (*panels c and d*).

**Supplemental Figure 2.** Evaluation of CAT12 and other common tools using Brainweb data. Higher *kappa* values correspond to a better overlap, larger reliability, and increased robustness. *Panel a:* Overlap between ground truth and segmentation outputs for different noise levels. CAT12 is similar to FSL-FAST6 at lower noise levels but clearly outperforms both SPM12 and FSL-FAST6 at higher noise levels. The latter is due to the implemented denoising step (see also Figure 3a for the effect of denoising). *Panel b:* Overlap between ground truth and segmentation outputs for different signal inhomogeneities. CAT12 is extremely robust across the entire range of intensity non-uniformity; it outperforms both SPM12 and FSL-FAST6.

**Supplemental Figure 3.** Comparison between CAT12's cross-sectional and longitudinal pipelines. Here we compared the longitudinal gray matter images of 25 patients with Alzheimer's disease and 25 matched controls. *Voxel-based morphometry* (VBM) results are shown on the left and *surface-based morphometry* (SBM) results on the right. For both VBM and SBM the longitudinal preprocessing leads to an increased sensitivity compared to cross-sectional processing, which is evident as larger clusters and lower *p*-values (*panels a and b*) as well as larger effect sizes (*panels c and d*). The effect sizes are captured as Cohen's *d* on the *x*-axis with the frequency of its occurrence normalized to a total sum of one (to ease comparisons between histograms) on the *y*-axis.

**Supplemental Figure 4.** CAT12's longitudinal processing workflows to examine (a) neuroplasticity, (b) aging, and (c) neurodevelopment. The first step in all three workflows is the creation of a high-quality average image over all time points. For this purpose, CAT12 realigns the images from all time points for each participant using inverse-consistent (or

symmetric) rigid-body registrations and intra-subject bias field correction. While this is sufficient to create the required average image for the neuroplasticity and aging workflows, the neurodevelopmental workflow requires non-linear registrations in addition. In either case, the resulting average image is segmented using CAT12's regular processing workflow to create a subject-specific *tissue probability map* (TPM). This TPM is used to enhance the time point-specific processing to create the final segmentations. The final tissue segments are then registered to MNI space to obtain a voxel-comparability across time points and subjects, which differs between all three workflows. In the neuroplasticity workflow, an average of the time point-specific registrations is created to transform the tissue segments of all time points to MNI space. The aging workflow does the same in principle but adds additional (very smooth) deformations between the individual images across time points to account for inevitable age-related changes over time (e.g., enlargements of the ventricles). In contrast, the neurodevelopmental workflow needs to account for major changes, such as overall head and brain growth, which requires independent non-linear registrations to MNI space of all images across time points (which are obtained using the default cross-sectional registration model).

**Supplemental Figure 5.** Subject-specific quality control. Individual quality ratings for each scan are helpful for determining potential problems and issues for the use of single scans. The 'Image Quality Ratings' (top) employ measures of noise, bias, and image resolution to generate a summary grade for each image [41]. A 'CAT Processing Report' (*left*) is automatically saved for each image after the processing workflow is completed; it provides information on image quality measures and the overall grade, in addition to visualizations which allow for an easy assessment of the quality of the skull stripping, tissue segmentation, and surface mapping. Moreover, a 'Longitudinal Report' (*right*) is automatically saved when any of the longitudinal pipelines have been used (see [Supplemental Note 3](#)). This longitudinal report – considering all images of one brain across all time points – provides the same information as the standard cross-sectional report but focuses on the assessment of differences between the individual time points.

**Supplemental Figure 6.** Group-specific quality control. In addition to the subject-specific quality control, larger studies in particular might benefit from scrutinizing those images that are either low in their individual quality ratings and/or different from the other images, suggesting anatomic anomalies, imperfect processing, or other issues that might hamper the subsequent statistical analysis. The 'Group Boxplot' (left) allows one to compare any image based on their similarity to the mean and reflects the homogeneity of the sample, by calculating the average Z-score of all spatially registered images (or surface parameter files). Lower average Z-score values indicate that the data points are more similar to the mean. Outliers (i.e., images with high Z-score values) indicate either a potential problem (with the image per se or with the outcomes of the image processing), or simply a variation in the neuroanatomy (e.g., enlarged ventricles). Such outliers should be checked carefully. An additional 'IQR x Mean Z-Score Window' (right) compares the average Z-scores with the weighted image quality rating (IQR) for each subject and allows a combined view of sample homogeneity and overall image quality.



**Supplemental Figure 7.** Volume mapping. CAT12 offers multiple ways to map voxel values onto the surface. The default mapping extracts voxel values at multiple positions along a surface normal between the white matter surface and the pial surface. The exact location of these positions along the normal is determined by an equi-volumetric model [42], which reflects the shift of cortical layers caused by local folding. However, voxel values can also be extracted at a specific user-defined displacement (in mm) from any given surface location.

**Supplemental Table 1.** Voxel-based ROI atlases available in CAT12 (as of October 2023)

**Supplemental Table 2.** Surface-based ROI atlases available in CAT12 (as of October 2023)

## List of abbreviations

AD: Alzheimer's disease; AMAP: adaptive maximum a posteriori; BIDS: Brain Imaging Data Structure; CAT: Computational Anatomy Toolbox; CSF: cerebrospinal fluid; DTI: diffusion tensor imaging; FDR: false discovery rate; fMRI: functional MRI; FWE: family-wise error; FWHM: full width at half maximum; GM: gray matter; IQR: image quality rating; MMSE: minimal mental status examination; MNI: Montreal Neurological Institute; MPRAGE: Magnetization Prepared Rapid Acquisition Gradient Echo; MP2RAGE: Magnetization Prepared 2 Rapid Acquisition Gradient Echoes; MRI: magnetic resonance image; PBT: projection-based thickness; PVE: partial volume estimation; RBM: region-based morphometry; ROI: region of interest; SANLM: spatially adaptive non-local means; SBM: surface-based morphometry; SLC: Stroke Lesion Correction; SPM: Statistical Parametric Mapping; TFCE: threshold-free cluster enhancement; TIV: total intracranial volume; TPM: tissue probability map; VBM: voxel-based morphometry; WM: white matter; WMH: white matter hyperintensity; WMHC: White Matter Hyperintensity Correction;

## Declarations

Not applicable

## Consent for publication

Not applicable

## Competing interests

The authors declare that they have no competing interests.

## Funding

E.L. received support through the Humboldt Foundation (Germany), the Swedish Collegium for Advanced Study (SCAS) and Erling-Persson Family Foundation (Sweden), the Eunice Kennedy Shriver National Institute of Child Health & Human Development of the National Institutes of Health (R01HD081720) and the Royal Society of New Zealand (Marsden 20-UOA-045). C.G. was supported by a Hood Fellowship from the University of Auckland (New Zealand), the Federal Ministry of Science and Education (BMBF) under the frame of ERA PerMed (Pattern-Cog ERAPERMED2021-127), the Marie Skłodowska-Curie

Innovative Training Network (SmartAge 859890 H2020-MSCA-ITN2019), and the Carl Zeiss Foundation (IMPULS P2019-01-006).

Data collection and sharing for this project was funded by the Alzheimer's Disease Neuroimaging Initiative (ADNI) (National Institutes of Health Grant U01 AG024904) and DOD ADNI (Department of Defense award number W81XWH-12-2-0012). ADNI is funded by the National Institute on Aging, the National Institute of Biomedical Imaging and Bioengineering, and through generous contributions from the following: AbbVie, Alzheimer's Association; Alzheimer's Drug Discovery Foundation; Araclon Biotech; BioClinica, Inc.; Biogen; Bristol-Myers Squibb Company; CereSpir, Inc.; Cogstate; Eisai Inc.; Elan Pharmaceuticals, Inc.; Eli Lilly and Company; EuroImmun; F. Hoffmann-La Roche Ltd and its affiliated company Genentech, Inc.; Fujirebio; GE Healthcare; IXICO Ltd.; Janssen Alzheimer Immunotherapy Research & Development, LLC.; Johnson & Johnson Pharmaceutical Research & Development LLC.; Lumosity; Lundbeck; Merck & Co., Inc.; Meso Scale Diagnostics, LLC.; NeuroRx Research; Neurotrack Technologies; Novartis Pharmaceuticals Corporation; Pfizer Inc.; Piramal Imaging; Servier; Takeda Pharmaceutical Company; and Transition Therapeutics. The Canadian Institutes of Health Research is providing funds to support ADNI clinical sites in Canada. Private sector contributions are facilitated by the Foundation for the National Institutes of Health [67]. The grantee organization is the Northern California Institute for Research and Education, and the study is coordinated by the Alzheimer's Therapeutic Research Institute at the University of Southern California. ADNI data are disseminated by the Laboratory of Neuro Imaging (LONI) at the University of Southern California (USC).

### **Authors' contributions**

Conceptualization: C.G., E.L.; software, methodology, visualization, and formal analysis: C.G., R.D.; writing—original draft: C.G., R.D., P.M.T., F.K., E.L.; supervision, funding acquisition: C.G., E.L.

## Supplemental Material

### Supplemental Notes

#### *Supplemental Note 1: Comparison with other tools*

We evaluated the performance of CAT12 by comparing it to other tools commonly used in the neuroimaging community. More specifically, we assessed the accuracy and sensitivity using CAT12, SPM12, FSL-FAST6, Freesurfer6 and CIVET 2.1 in detecting subtle alterations in brain structure that are critical for early diagnosis and monitoring of Alzheimer's disease. Note, the primary aim of our comparison is to provide insights into the tool's performances; revealing aberrations associated with Alzheimer's disease is only a secondary aim of this paper. To conduct the comparisons, we used the same baseline data of our example application (25 patients with Alzheimer's disease and 25 matched controls), as described in the main article. The analyses focused on (1) voxel-wise gray matter volume and (2) point-wise cortical thickness. Analyses pertaining to (1) were conducted using voxel-based morphometry (VBM) while processing the data with (1a) SPM version 12 [12] as well as with (1b) FSL-FAST version 6 [4]. Analyses pertaining to (2) were conducted using surface-based morphometry (SBM) while processing the data with (2a) Freesurfer version 7.2 [2] as well as with (2b) Civet version 2.1 [6].

#### Data Processing for VBM data

1a – SPM12: We applied the Unified Segmentation [16] in SPM12 with default settings to extract rigidly registered gray and white matter segments. These individual segments provided the basis to create a mean segment using the Shooting toolbox [24] in SPM12. This mean segment functions as an initial template and is warped to each of the individual segments, which is followed by calculating the resulting deformations, applying the inverses of the deformations to the individual images, and re-calculating the template (aka the mean segment). This process is repeated several times. The results are spatially registered segments which will be adjusted for volume changes introduced by the registration (modulation) and convoluted with a Gaussian kernel of FWHM 6mm (smoothing).

1b – FSL-FAST6: We applied the FSLVBM script from FSL6 to process the data [70]. The default there is using BET to skull-strip the data. However, the achieved output was of poor quality, which is why we used the aforementioned SPM12 segments (in native space) to skull-strip the data. The skull-stripped data were then processed using the FSLVBM script and smoothed with a 6mm Gaussian kernel, as described above.

#### Data Processing for SBM data

2a – Freesurfer7.2 The data were processed using the recon-all script for Freesurfer7.2 [2] with default settings. For a better comparison between tools, the resulting cortical thickness measures were resampled and smoothed (FWHM 12 mm) using CAT12.

2b – CIVET2.1: The data were uploaded to CBRAIN (RRID:SCR\_005513) [71] and processed with the CIVET2.1 pipeline using default settings. Again, the cortical thickness

measures were resampled and smoothed (FWHM 12 mm) using CAT to allow for a better comparison between tools.

### Statistical Analysis

For details on the statistical model (e.g., dependent variables, independent variables, and variables of no interest), refer to the Methods section in the main document. All results were corrected for multiple comparisons by applying TFCE [45] and controlling the family-wise error at  $p < 0.001$ . All statistical tests were one-tailed given our a priori hypothesis that AD patients present with less gray matter at baseline and a larger loss of gray matter over time. In addition, we calculated the effect sizes to allow for a direct comparison across tools with respect to their sensitivity in detecting significant differences between AD patients and controls.

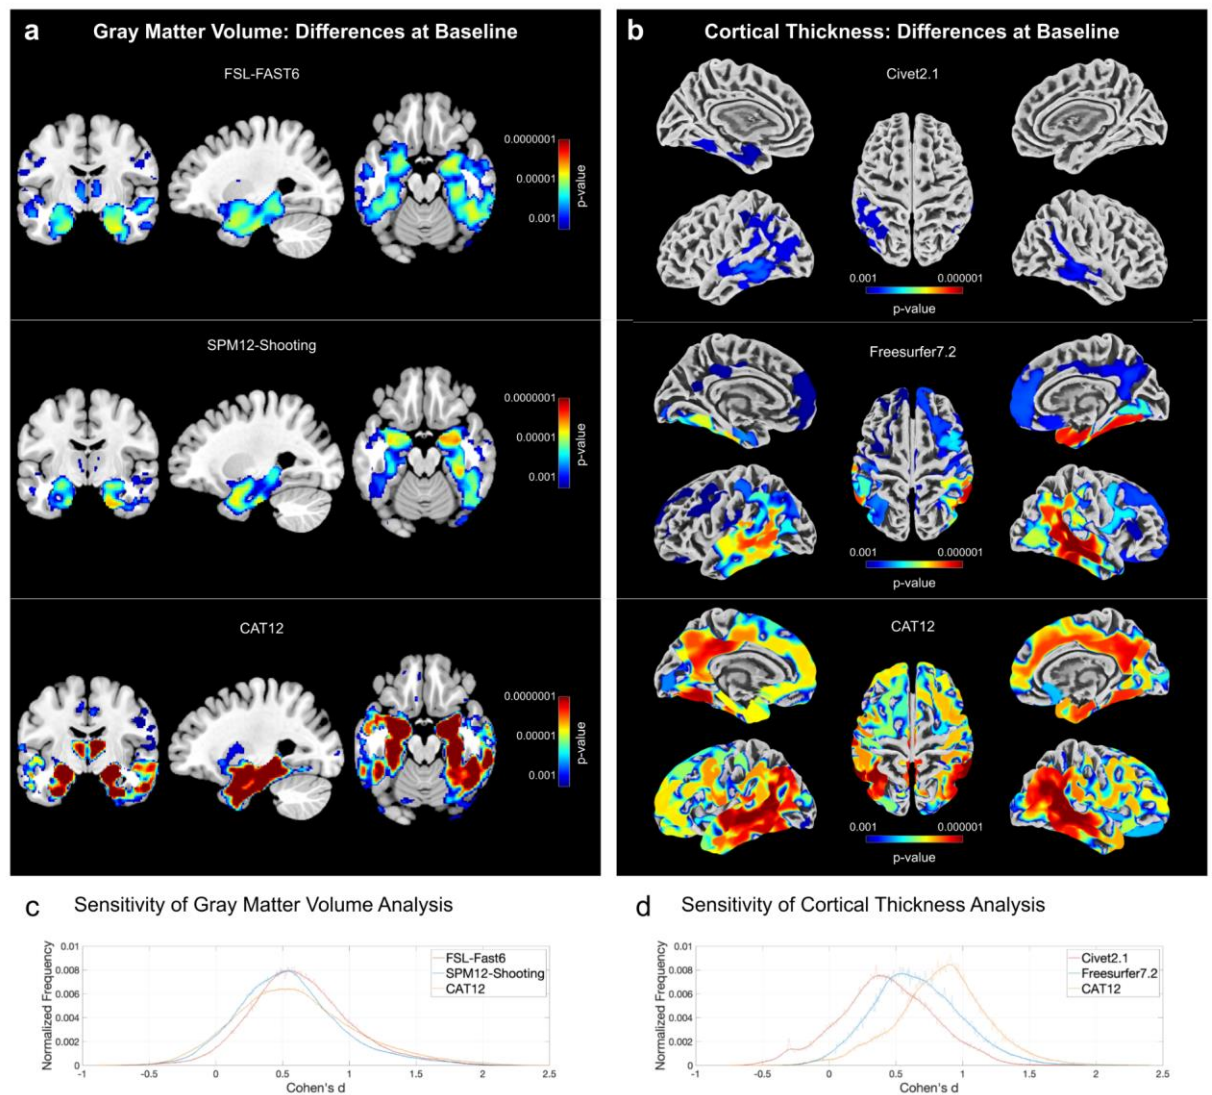

**Supplemental Figure 1: Comparisons between CAT12 and other common tools.** Here we compared the baseline gray matter images of 25 patients with Alzheimer's disease and 25 matched controls. *Panel a:* VBM analyses of voxel-wise gray matter volume using FSL-FAST6 (*top*), SPM12-Shooting (*middle*), and CAT12

(bottom). Panel b: SBM analyses of point-wise cortical thickness using CIVET2.1 (top), Freesurfer7.2 (middle), and CAT12 (bottom). Panels c and d: Sensitivity of VBM and SBM analyses. The effect sizes (Cohen's  $d$ ) are shown on the  $x$ -axis; their frequency is shown on the  $y$ -axis (occurrence is normalized to one to facilitate comparisons between histograms). For both VBM and SBM, CAT12 demonstrates a larger sensitivity in detecting structural differences. This is reflected in the more extended significance clusters and lower  $p$ -values (panels a and b) as well as larger effect sizes (panels c and d).

### *Supplemental Note 2: Evaluation with simulated data*

To comprehensively evaluate the performance of CAT12 in comparison with other neuroimaging tools (SPM12 and FSL-FAST6), we conducted evaluations using simulated data generated from BrainWeb [40]. More specifically, we compared the output of CAT12, SPM12, and FSL-FAST6 to ground truth data represented by a brain phantom. As the phantom contains known variations in noise levels and signal inhomogeneities, it aids in objectively assessing the accuracy and robustness of CAT12 and the other tools in dealing with different sources of variation. To measure the agreement between the ground truth and the results of CAT12, SPM12, and FSL-FAST6, we calculated the kappa coefficient.

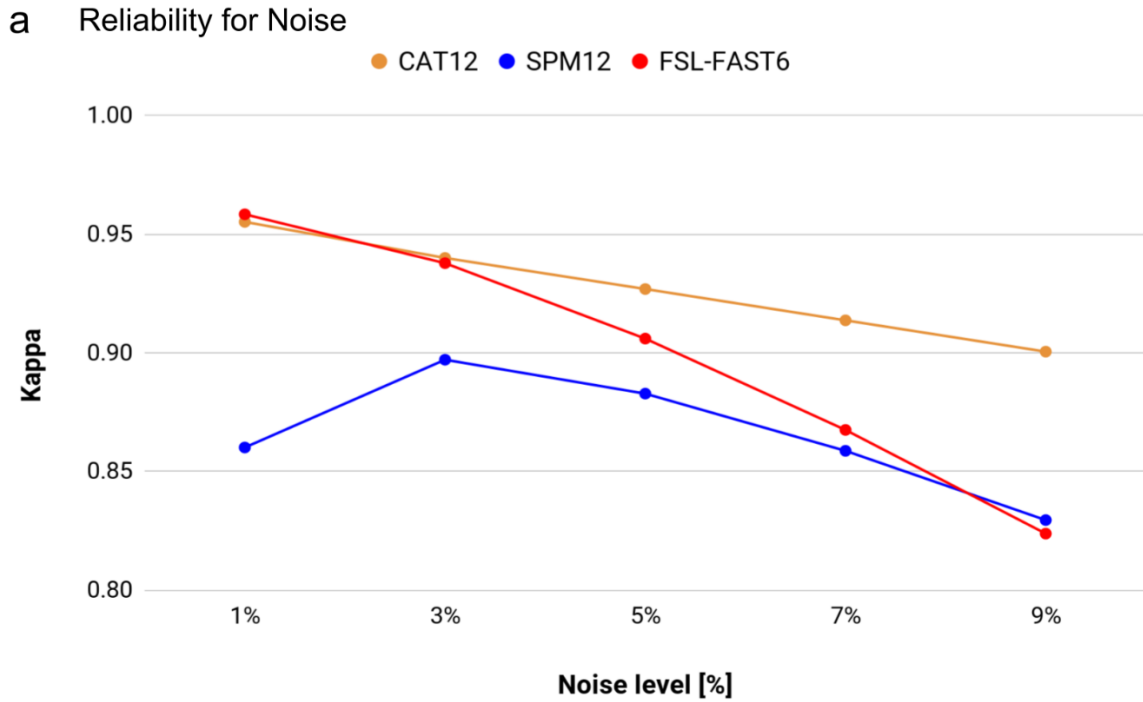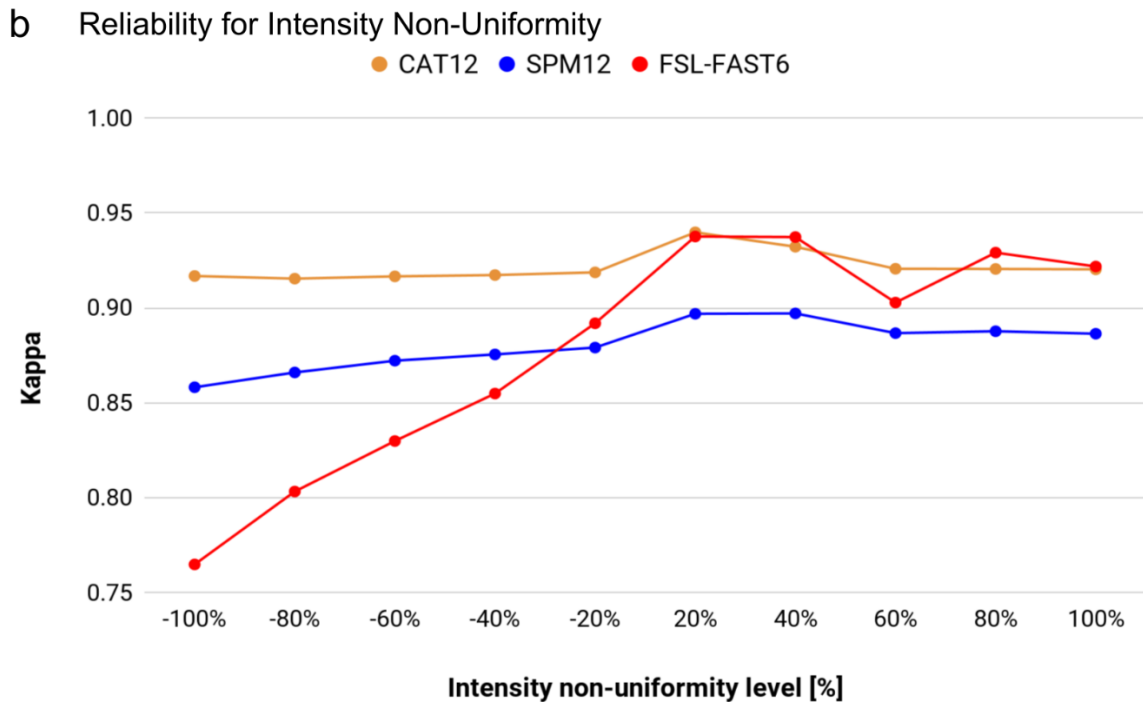

**Supplemental Figure 2: Evaluation of CAT12 and other common tools using Brainweb data.** Higher *kappa* values correspond to a better overlap, larger reliability, and increased robustness. *Panel a*: Overlap between ground truth and segmentation outputs for different noise levels. CAT12 is similar to FSL-FAST6 at lower noise levels but clearly outperforms both SPM12 and FSL-FAST6 at higher noise levels. The latter is due to the implemented denoising step (see also Figure 3a for the effect of denoising). *Panel b*: Overlap between ground truth and segmentation outputs for different signal inhomogeneities. CAT12 is extremely robust across the entire range of intensity non-uniformity; it outperforms both SPM12 and FSL-FAST6.

### Supplemental Note 3: Longitudinal Processing

The majority of morphometric studies are based on cross-sectional data in which one image is acquired for each subject. Nevertheless, the mapping of structural changes over time requires specific longitudinal designs that consider additional time points (and thus images) for each subject. In theory, all images could be processed using the standard cross-sectional processing workflow. In practice, however, longitudinal data strongly benefit from workflows specifically tailored towards longitudinal analyses, where MR-based noise and inhomogeneities are further reduced and where spatial correspondences are ensured, the latter not only across subjects but also across time points within subjects [72–74]. As a consequence, analyses become more sensitive, as shown in **Supplemental Figure 3**.

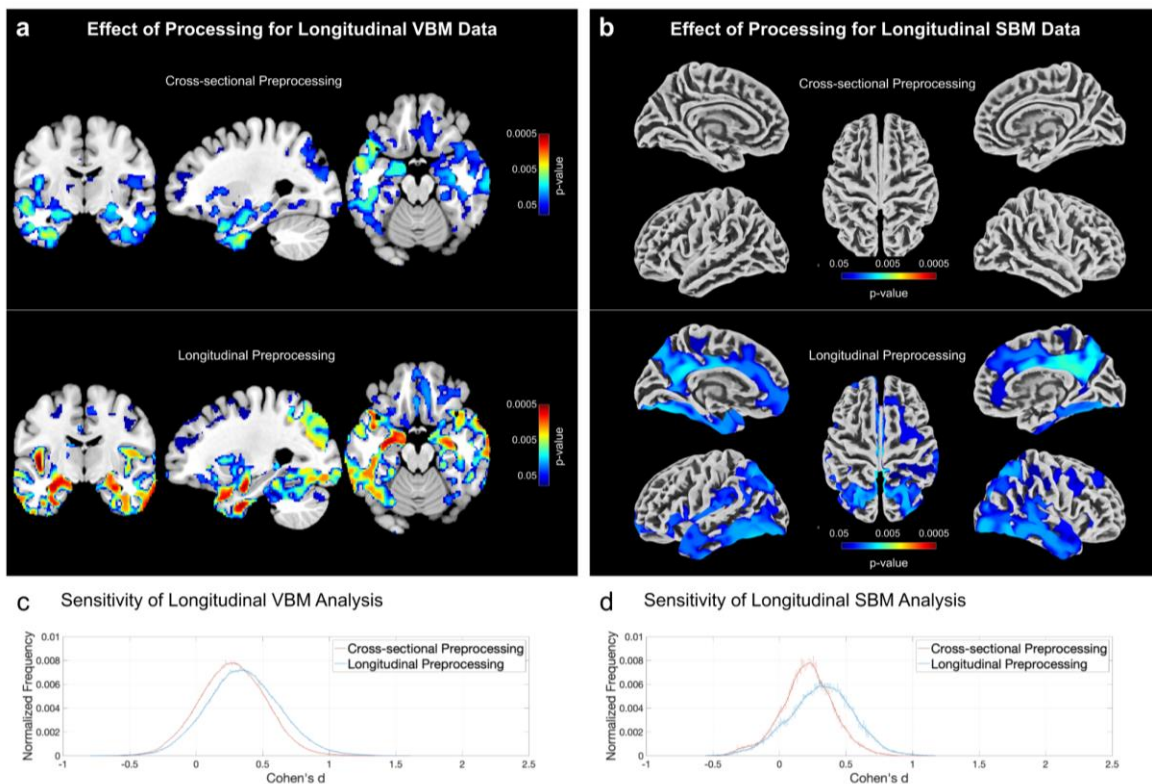

**Supplemental Figure 3: Comparison between CAT12's cross-sectional and longitudinal pipelines.** Here we compared the longitudinal gray matter images of 25 patients with Alzheimer's disease and 25 matched controls. *Voxel-based morphometry* (VBM) results are shown on the left and *surface-based morphometry* (SBM) results on the right. For both VBM and SBM the longitudinal preprocessing leads to an increased sensitivity compared to cross-sectional processing, which is evident as larger clusters and lower p-values (panels a and b) as well as larger effect sizes (panels c and d). The effect sizes are captured as Cohen's d on the x-axis with the frequency of its occurrence normalized to a total sum of one (to ease comparisons between histograms) on the y-axis.

CAT12 offers three optimized processing pipelines for longitudinal studies: One for neuroplasticity, one for aging, and one for neurodevelopmental studies. Studies in the framework of neuroplasticity are confined to short time-frames of weeks to months, and even days [75,76]. In contrast, studies in the framework of aging and neurodevelopment cover longer time frames of years and, sometimes, even decades. For such extended study durations, it is particularly important to model systematic changes of the brain over time to maintain a voxel- or point-wise comparability across time points. Studies in the framework of neurodevelopment require additional considerations of increasing brain and head sizes. A detailed description of all three longitudinal processing workflows is provided in **Supplemental Figure 4**.

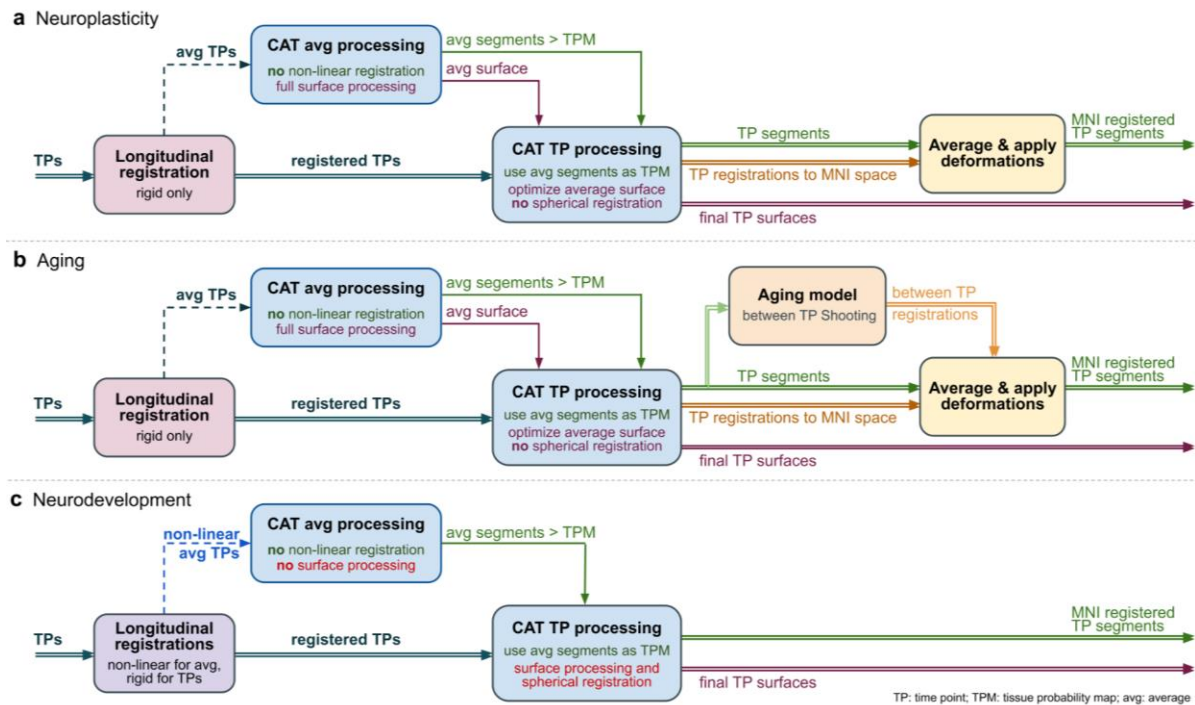

**Supplemental Figure 4:** CAT12's longitudinal processing workflows to examine (a) neuroplasticity, (b) aging, and (c) neurodevelopment. The first step in all three workflows is the creation of a high-quality average image over all time points. For this purpose, CAT12 realigns the images from all time points for each participant using inverse-consistent (or symmetric) rigid-body registrations and intra-subject bias field correction. While this is sufficient to create the required average image for the neuroplasticity and aging workflows, the neurodevelopmental workflow requires non-linear registrations in addition. In either case, the resulting average image is segmented using CAT12's regular processing workflow to create a subject-specific *tissue probability map* (TPM). This TPM is used to enhance the time point-specific processing to create the final segmentations. The final tissue segments are then registered to MNI space to obtain a voxel-comparability across time points and subjects, which differs between all three workflows. In the neuroplasticity workflow, an average of the time point-specific registrations is created to transform the tissue segments of all time points to MNI space. The aging workflow does the same in principle but adds additional (very smooth) deformations between the individual images across time points to account for inevitable age-related changes over time (e.g., enlargements of the ventricles). In contrast, the neurodevelopmental workflow needs to account for major changes, such as



overall head and brain growth, which requires independent non-linear registrations to MNI space of all images across time points (which are obtained using the default cross-sectional registration model).

#### *Supplemental Note 4: Quality Control*

Processing of MRI data strongly depends on the quality of the input data. Multi-center studies and data sharing projects, in particular, need to take into account varying image properties due to different scanners, sequences and protocols. However, even scans acquired on a single scanner and using the same scanning protocol may vary due to motion or other miscellaneous artifacts. CAT12 provides options to perform quality checks, both on the subject level and on the group level. More specifically, on the subject level, CAT12 introduces a novel retrospective quality control framework for the quantification of quality differences between different scans obtained on a single scanner or across different scanners. The quality control allows for the evaluation of essential image parameters (i.e., noise, intensity inhomogeneities, and image resolution) and is automatically performed for each brain when running CAT12's image processing workflow (see **Supplemental Figure 5**). On the group-level, CAT12 provides options to check and visualize the homogeneity of the entire study sample, thus allowing the user to identify any outliers (see **Supplemental Figure 6**).

## Image Quality Ratings

| Image quality definition        | excellent |     | good |     | satisfactory |     | sufficient |     | critical |     | unacceptable / failed |     |      |   |    |   |  |
|---------------------------------|-----------|-----|------|-----|--------------|-----|------------|-----|----------|-----|-----------------------|-----|------|---|----|---|--|
| BWP noise (in percent)          | 0         | 1   | 2    | 3   | 4            | 5   | 6          | 7   | 8        | 9   | 10                    | 15  | 20   |   |    |   |  |
| BWP bias (in percent)           | 0         | 20  | 40   | 60  | 80           | 100 | 120        | 140 | 160      | 180 | 200                   | 300 | 400  |   |    |   |  |
| resolution RES (mm)             | 0         | 0.5 |      | 1.0 |              | 1.5 |            | 2.0 |          | 2.5 |                       | 4.0 | 5.5  |   |    |   |  |
| <b>Quality ratings</b>          |           |     |      |     |              |     |            |     |          |     |                       |     |      |   |    |   |  |
| percentaged rating points (rps) | 100       | 95  | 90   | 85  | 80           | 75  | 70         | 65  | 60       | 55  | 50                    | 25  | 0    |   |    |   |  |
| linear rating scale             | 0.5       | 1   | 1.5  | 2   | 2.5          | 3   | 3.5        | 4   | 4.5      | 5   | 5.5                   | 8   | 10.5 |   |    |   |  |
| nominal numbers                 | 1+        | 1   | 1-   | 2+  | 2            | 2-  | 3+         | 3   | 3-       | 4+  | 4                     | 4-  | 5+   | 5 | 5- | 6 |  |
| nominal letters                 | A+        | A   | A-   | B+  | B            | B-  | C+         | C   | C-       | D+  | D                     | D-  | E+   | E | E- | F |  |
| description                     | excellent |     | good |     | satisfactory |     | sufficient |     | critical |     | unacceptable / failed |     |      |   |    |   |  |

## CAT Processing Report

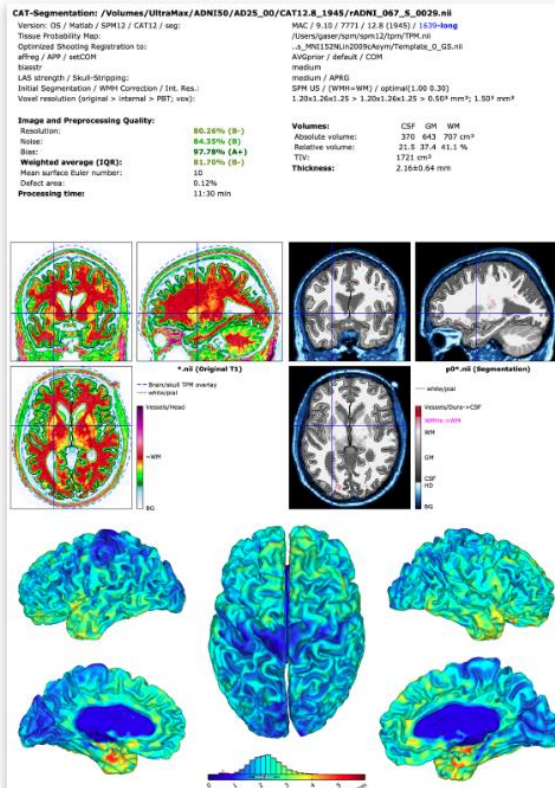

## Longitudinal Report

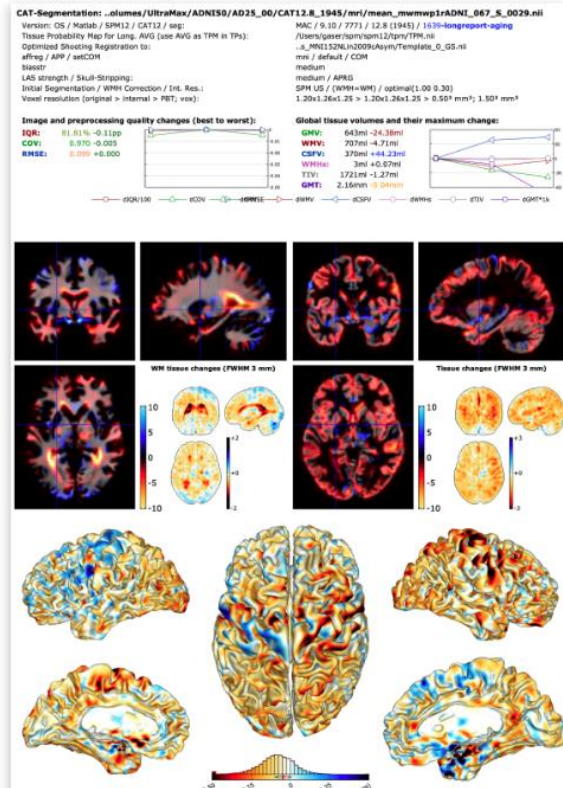

**Supplemental Figure 5:** Subject-specific quality control. Individual quality ratings for each scan are helpful for determining potential problems and issues for the use of single scans. The ‘Image Quality Ratings’ (top) employ measures of noise, bias, and image resolution to generate a summary grade for each image [41]. A ‘CAT Processing Report’ (left) is automatically saved for each image after the processing workflow is completed; it provides information on image quality measures and the overall grade, in addition to visualizations which allow for an easy assessment of the quality of the skull stripping, tissue segmentation, and surface mapping. Moreover, a ‘Longitudinal Report’ (right) is automatically saved when any of the longitudinal pipelines have been used (see Supplemental Note 3). This longitudinal report – considering all images of one brain across all time points – provides the same information as the standard cross-sectional report but focuses on the assessment of differences between the individual time points.

Group Boxplot

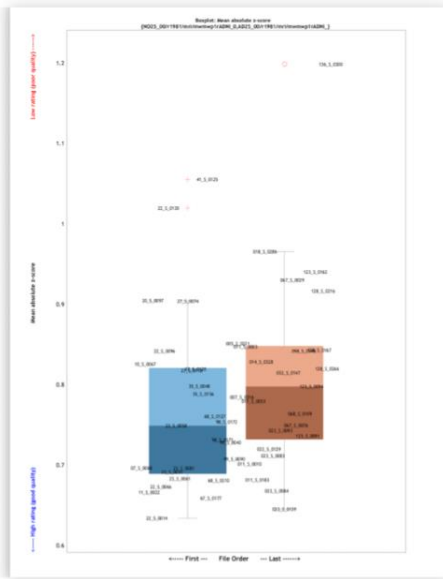

IQR x Mean Z-Score Window

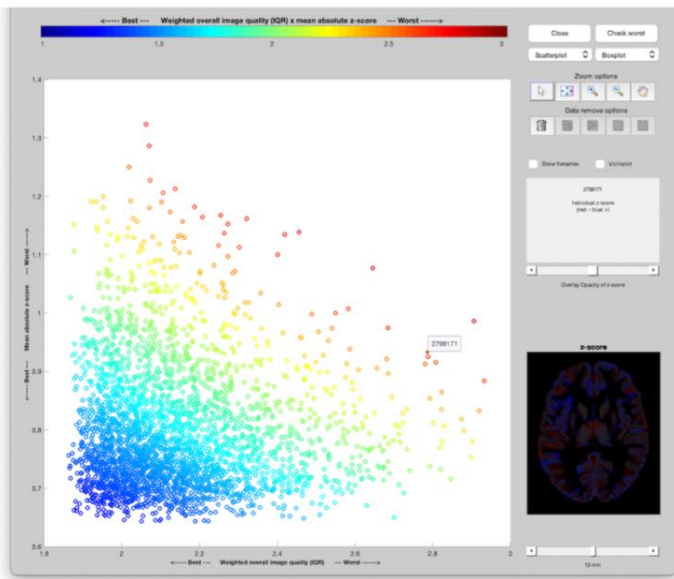

**Supplemental Figure 6:** Group-specific quality control. In addition to the subject-specific quality control, larger studies in particular might benefit from scrutinizing those images that are either low in their individual quality ratings and/or different from the other images, suggesting anatomic anomalies, imperfect processing, or other issues that might hamper the subsequent statistical analysis. The ‘Group Boxplot’ (left) allows one to compare any image based on their similarity to the mean and reflects the homogeneity of the sample, by calculating the average Z-score of all spatially registered images (or surface parameter files). Lower average Z-score values indicate that the data points are more similar to the mean. Outliers (i.e., images with high Z-score values) indicate either a potential problem (with the image per se or with the outcomes of the image processing), or simply a variation in the neuroanatomy (e.g., enlarged ventricles). Such outliers should be checked carefully. An additional ‘IQR x Mean Z-Score Window’ (right) compares the average Z-scores with the weighted image quality rating (IQR) for each subject and allows a combined view of sample homogeneity and overall image quality.

### *Supplemental Note 5: Mapping onto the Cortical Surface*

Surface-based analyses offer some advantages over voxel-based approaches, such as better inter-subject registration and surface-based smoothing, which may result in a larger statistical power and improved accuracy [77,78]. CAT12 provides a range of options to map voxel-based values (e.g., functional, quantitative or diffusion parameters) to individual brain surfaces for a subsequent surface-based analysis. For this purpose, voxel-based values are extracted at multiple positions along the surface normal at each node of the surface (see **Supplemental Figure 7**). The exact positions along the surface normal are determined by an equi-volume model [42], which reflects the normal shift of cytoarchitectonic layers caused by the local folding. In addition to default settings, users can specify both the number and location of those positions along the surface normal. The extracted values along the surface normal are then summarized as one value per node. The default here is to summarize values by using the absolute maximum value. However, other options than using the absolute

maximum exist, such as using the minimum, mean, or weighted mean value. Alternatively, users may choose to map voxel values at a specified distance (in mm) from the surface or even at multiple positions along the surface normal. The latter is useful, for example, when conducting a layer-specific analysis of ultra-high resolution functional MRI data [43,44].

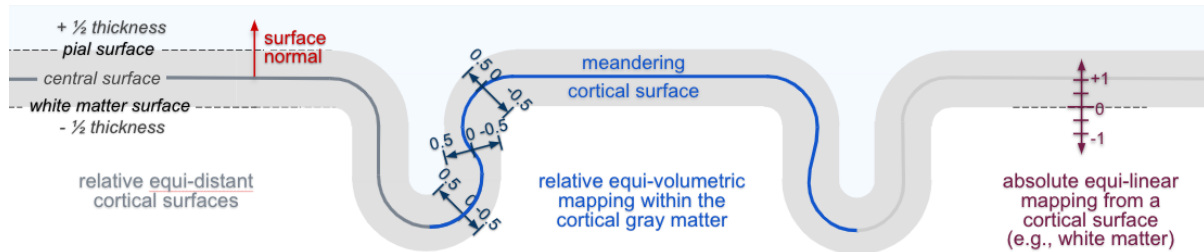

**Supplemental Figure 7:** Volume mapping. CAT12 offers multiple ways to map voxel values onto the surface. The default mapping extracts voxel values at multiple positions along a surface normal between the white matter surface and the pial surface. The exact location of these positions along the normal is determined by an equi-volumetric model [42], which reflects the shift of cortical layers caused by local folding. However, voxel values can also be extracted at a specific user-defined displacement (in mm) from any given surface location.

*Supplemental Note 6: Threshold-free Cluster Enhancement (TFCE)*

SPM’s standard correction for multiple comparisons is based either on the magnitude of the T or F statistic (correction on voxel-level) or on the extent of clusters in a thresholded statistical map (correction on cluster level). The principle of TFCE – as implemented in CAT12’s TFCE toolbox – is to combine both approaches, which has several theoretical and practical advantages, as detailed elsewhere [45]. Briefly, it retains the sensitivity of cluster-based inferences, while avoiding their main downsides, such as arbitrary cluster-forming thresholds or susceptibility to non-stationarity that may compromise the statistical validity [79–81]. As a special feature in CAT, the TFCE toolbox automatically recognizes exchangeability blocks and potential nuisance parameters [46], which would otherwise need to be specified by the user.

*Supplemental Note 7: Customized Methods for Clinical Data*

**Stroke Lesion Correction (SLC)**

To mitigate improper deformations during spatial registration in brains with stroke lesions, the CAT12 toolbox offers a Stroke Lesion Correction (SLC) method. This feature suppresses strong (high-frequency) deformations during the Shooting registration step, which can occur due to the presence of lesions. To utilize this method, the lesions must be set to zero. This can be achieved by employing the Manual Image Masking batch, where a lesion mask can be created. Subsequently, the SLC flag should be enabled in the expert mode of CAT12. This ensures that the regions containing lesions are excluded from the spatial registration, preventing large deformations that might otherwise arise when aligning the lesioned brain with a template brain.

By implementing this correction, CAT12 facilitates more accurate spatial alignment, particularly for clinical data involving stroke patients. This approach is essential for neuroimaging studies, where a precise alignment of brain structures is crucial for the subsequent analysis.

#### White Matter Hyperintensity Correction (WMHC)

The accurate detection of white matter hyperintensities (WMHs) is crucial to prevent registration errors, such as the inappropriate mapping of WMHs to typical gray matter locations. Additionally, WMHs in close proximity to the cortex can lead to surface reconstruction errors by being misinterpreted as gray matter.

To address this issue, CAT12 initially employs a low-resolution shooting registration technique [24] on the preliminary SPM segments to align the tissue probability map and the CAT12 atlas with the individual image space. Subsequently, local tissue and region corrections are conducted using region-growing and bottleneck algorithms [19].

Within the individual segmentation map, isolated GM islands within the WM and voxels adjacent to the lateral ventricles that have high WM probability but GM-like intensity are classified as WMHs. These areas with GM-like intensity but a WMH label are either temporarily aligned with WM or treated as a separate tissue class, depending on the WMH correction (WMHC) processing parameters.

## Supplemental Tables

**Supplemental Table 1:** Voxel-based ROI atlases available in CAT12 (as of October 2023)

| Atlas                                | Reference                                                                                                                |
|--------------------------------------|--------------------------------------------------------------------------------------------------------------------------|
| Neuromorphometrics                   | [65]                                                                                                                     |
| LPBA40                               | [33,82]                                                                                                                  |
| Cobra                                | [83–88]<br>(built from 5 atlases provided by the <i>Computational Brain Anatomy Laboratory</i> at the Douglas Institute) |
| Mori                                 | [89,90]                                                                                                                  |
| IBSR                                 | [91]                                                                                                                     |
| Hammers                              | [92,93]                                                                                                                  |
| JuBrain Anatomy                      | [94,95]                                                                                                                  |
| Julich-Brain Cytoarchitectonic Atlas | [96,97]                                                                                                                  |
| AAL3                                 | [98–100]                                                                                                                 |
| Thalamus                             | [101,102]                                                                                                                |
| Thalamic Nuclei                      | [103,104]                                                                                                                |
| Melbourne Subcortical Atlas          | [105,106]                                                                                                                |
| SUIT Atlas of the human cerebellum   | [107,108]                                                                                                                |

**Supplemental Table 2:** Surface-based ROI atlases available in CAT12 (as of October 2023)

| Atlas                                                       | Reference |
|-------------------------------------------------------------|-----------|
| DK40 (Desikan-Killiany)                                     | [34,109]  |
| Destrieux                                                   | [110,111] |
| Human Connectome Project (HCP) Multi-Modal Parcellation     | [112,113] |
| Local-Global Intrinsic Functional Connectivity Parcellation | [114,115] |

## References

1. SPM. <https://www.fil.ion.ucl.ac.uk/spm>
2. FreeSurfer. <https://surfer.nmr.mgh.harvard.edu>
3. Human Connectome Workbench.  
<https://www.humanconnectome.org/software/connectome-workbench>
4. FSL. <https://www.fmrib.ox.ac.uk/fsl>
5. BrainVISA. <http://www.brainvisa.info>
6. CIVET. <https://mcin.ca/technology/civet>
7. LONI Tools. <https://www.loni.usc.edu/research/software>
8. SPM Extensions. <https://www.fil.ion.ucl.ac.uk/spm/ext>

9. CAT12 Website. <https://neuro-jena.github.io/cat>
10. Tadel F, Baillet S, Mosher JC, Pantazis D, Leahy RM. Brainstorm: a user-friendly application for MEG/EEG analysis. *Comput Intell Neurosci*. Hindawi Publishing Corporation; 2011; doi: 10.1155/2011/879716.
11. Mutsaerts HJMM, Petr J, Groot P, Vandemaele P, Ingala S, Robertson AD, et al. ExploreASL: An image processing pipeline for multi-center ASL perfusion MRI studies. *NeuroImage*. Elsevier; 2020; doi: 10.1016/J.NEUROIMAGE.2020.117031.
12. SPM12. <http://www.fil.ion.ucl.ac.uk/spm/software/spm12>
13. CAT12 ENIGMA Standalone. <https://neuro-jena.github.io/enigma-cat12/#standalone>
14. CAT12 Online Help. <https://neuro-jena.github.io/cat12-help>
15. Manjón JV, Coupé P, Martí-Bonmatí L, Collins DL, Robles M. Adaptive non-local means denoising of MR images with spatially varying noise levels. *J Magn Reson Imaging*. Wiley; 2010; doi: 10.1002/JMRI.22003.
16. Ashburner J, Friston KJ. Unified segmentation. *NeuroImage*. 2005; doi: 10.1016/j.neuroimage.2005.02.018.
17. Rajapakse JC, Giedd JN, Rapoport JL. Statistical approach to segmentation of single-channel cerebral MR images. *IEEE Trans Med Imaging*. IEEE; 1997; doi: 10.1109/42.563663.
18. Tohka J, Zijdenbos A, Evans A. Fast and robust parameter estimation for statistical partial volume models in brain MRI. *NeuroImage*. 2004; doi: 10.1016/j.neuroimage.2004.05.007.
19. Dahnke R, Yotter RA, Gaser C. Cortical thickness and central surface estimation. *NeuroImage*. 2013; doi: 10.1016/j.neuroimage.2012.09.050.
20. Yotter RA, Dahnke R, Thompson PM, Gaser C. Topological correction of brain surface meshes using spherical harmonics. *Hum Brain Mapp*. 2011; doi: 10.1002/hbm.21095.
21. Ashburner J. A fast diffeomorphic image registration algorithm. *NeuroImage*. Academic Press; 38:95–1132007;
22. Fischl B, Dale AM. Measuring the thickness of the human cerebral cortex from magnetic resonance images. *Proc Natl Acad Sci*. National Academy of Sciences (NAS); 2000; doi: 10.1073/PNAS.200033797.
23. Masouleh SK, Eickhoff SB, Zeighami Y, Lewis LB, Dahnke R, Gaser C, et al. Influence of Processing Pipeline on Cortical Thickness Measurement. *Cereb Cortex*. Oxford University Press; 2020; doi: 10.1093/CERCOR/BHAA097.
24. Ashburner J, Friston KJ. Diffeomorphic registration using geodesic shooting and Gauss-Newton optimisation. *NeuroImage*. Elsevier; 2011; doi: 10.1016/J.NEUROIMAGE.2010.12.049.
25. ICBM152NLin2009. <https://www.bic.mni.mcgill.ca/ServicesAtlases/ICBM152NLin2009>
26. Kurth F, Luders E, Gaser C. Voxel-Based Morphometry.
27. Malone IB, Leung KK, Clegg S, Barnes J, Whitwell JL, Ashburner J, et al. Accurate automatic estimation of total intracranial volume: a nuisance variable with less nuisance. *NeuroImage*. Elsevier; 2014; doi: 10.1016/J.NEUROIMAGE.2014.09.034.
28. FsAverage. <https://surfer.nmr.mgh.harvard.edu/fswiki/FsAverage>
29. Yotter RA, Thompson PM, Gaser C. Algorithms to improve the reparameterization of spherical mappings of brain surface meshes. *J Neuroimaging Off J Am Soc Neuroimaging*. 2011; doi: 10.1111/j.1552-6569.2010.00484.x.
30. Yotter RA, Ziegler G, Thompson P, Gaser C. Diffeometric Anatomical Registration on

- the Surface. *Organ Hum Brain Mapp*. Quebec City;
31. Aubert-Broche B, Evans AC, Collins L. A new improved version of the realistic digital brain phantom. *NeuroImage*. Elsevier; 2006; doi: 10.1016/J.NEUROIMAGE.2006.03.052.
  32. IXI Dataset. <http://www.brain-development.org>
  33. Shattuck DW, Mirza M, Adisetiyo V, Hojatkashani C, Salamon G, Narr KL, et al. Construction of a 3D probabilistic atlas of human cortical structures. *NeuroImage*. Elsevier; 2007; doi: 10.1016/J.NEUROIMAGE.2007.09.031.
  34. Desikan RS, Ségonne F, Fischl B, Quinn BT, Dickerson BC, Blacker D, et al. An automated labeling system for subdividing the human cerebral cortex on MRI scans into gyral based regions of interest. *NeuroImage*. 2006; doi: DOI: 10.1016/j.neuroimage.2006.01.021.
  35. Luders E, Thompson PM, Narr KL, Toga AW, Jancke L, Gaser C. A curvature-based approach to estimate local gyrification on the cortical surface. *NeuroImage*. 2006; doi: 10.1016/j.neuroimage.2005.08.049.
  36. Essen DCV. A Population-Average, Landmark- and Surface-based (PALS) atlas of human cerebral cortex. *NeuroImage*. Elsevier; 2005; doi: 10.1016/J.NEUROIMAGE.2005.06.058.
  37. Yotter RA, Nenadic I, Ziegler G, Thompson PM, Gaser C. Local cortical surface complexity maps from spherical harmonic reconstructions. *NeuroImage*. 2011; doi: 10.1016/j.neuroimage.2011.02.007.
  38. Toro R, Perron M, Pike B, Richer L, Veillette S, Pausova Z, et al. Brain size and folding of the human cerebral cortex. *Cereb Cortex*. Oxford University Press; 2008; doi: 10.1093/CERCOR/BHM261.
  39. Barnes J, Ridgway GR, Bartlett J, Henley SMD, Lehmann M, Hobbs N, et al. Head size, age and gender adjustment in MRI studies: a necessary nuisance? *NeuroImage*. 2010; doi: 10.1016/j.neuroimage.2010.06.025.
  40. BrainWeb. <https://brainweb.bic.mni.mcgill.ca/brainweb>
  41. Gilmore AD, Buser NJ, Hanson JL. Variations in structural MRI quality significantly impact commonly used measures of brain anatomy. *Brain Inform*. Springer Nature; 2021; doi: 10.1186/S40708-021-00128-2.
  42. Bok ST. Der Einfluss der in den Furchen und Windungen auftretenden Krümmungen der Grosshirnrinde auf die Rindenarchitektur. *Eur Arch Psychiatry Clin Neurosci*. Springer Nature; 1929; doi: 10.1007/BF02864437.
  43. Kemper VG, Martino FD, Emmerling TC, Yacoub E, Goebel R. High resolution data analysis strategies for mesoscale human functional MRI at 7 and 9.4T. *NeuroImage*. Elsevier; 2017; doi: 10.1016/J.NEUROIMAGE.2017.03.058.
  44. Waehnert MD, Dinse J, Weiss M, Streicher MN, Waehnert P, Geyer S, et al. Anatomically motivated modeling of cortical laminae. *NeuroImage*. Elsevier; 2013; doi: 10.1016/J.NEUROIMAGE.2013.03.078.
  45. Smith SM, Nichols TE. Threshold-free cluster enhancement: Addressing problems of smoothing, threshold dependence and localisation in cluster inference. *NeuroImage*. 44:83–982009;
  46. Winkler AM, Ridgway GR, Webster MA, Smith SM, Nichols TE. Permutation inference for the general linear model. *NeuroImage*. Elsevier; 2014; doi: 10.1016/J.NEUROIMAGE.2014.01.060.
  47. Bayram E, Caldwell JZK, Banks SJ. Current understanding of magnetic resonance



imaging biomarkers and memory in Alzheimer's disease. *Alzheimers Dement Transl Res Clin Interv.* Wiley; 2018; doi: 10.1016/J.TRCL.2018.04.007.

48. Dickerson BC. Advances in quantitative magnetic resonance imaging-based biomarkers for Alzheimer disease. *Alzheimers Res Ther.* Springer Nature; 2010; doi: 10.1186/ALZRT45.

49. Hutton C, Draganski B, Ashburner J, Weiskopf N. A comparison between voxel-based cortical thickness and voxel-based morphometry in normal aging. *NeuroImage.* 2009; doi: 10.1016/j.neuroimage.2009.06.043.

50. Winkler AM, Greve DN, Bjuland KJ, Nichols TE, Sabuncu MR, Håberg AK, et al. Joint Analysis of Cortical Area and Thickness as a Replacement for the Analysis of the Volume of the Cerebral Cortex. *Cereb Cortex.* Oxford University Press; 2018; doi: 10.1093/CERCOR/BHX308.

51. Guo C, Ferreira D, Fink K, Westman E, Granberg T. Repeatability and Reproducibility of FreeSurfer, FSL-SIENAX and SPM Brain Volumetric Measurements and the Effect of Lesion Filling in Multiple Sclerosis. *Eur Radiol.* 2018; doi: 10.1007/s00330-018-5710-x.

52. Zhou X, Wu R, Zeng Y, Qi Z, Ferraro S, Xu L, et al. Choice of Voxel-based Morphometry Processing Pipeline Drives Variability in the Location of Neuroanatomical Brain Markers. *Commun Biol.* 2022; doi: 10.1038/s42003-022-03880-1.

53. Khlif MS, Egorova N, Werden E, Redolfi A, Boccardi M, DeCarli CS, et al. A Comparison of Automated Segmentation and Manual Tracing in Estimating Hippocampal Volume in Ischemic Stroke and Healthy Control Participants. *NeuroImage Clin.* 2019; doi: 10.1016/j.nicl.2018.10.019.

54. Tavares V, Prata D, Ferreira HA. Comparing SPM12 and CAT12 Segmentation Pipelines: A Brain Tissue Volume-Based Age and Alzheimer's Disease Study. *J Neurosci Methods.* 2019; doi: 10.1016/j.jneumeth.2019.108565.

55. Ay U, Kizilates-Evin G, Bayram A, Kurt E, Demiralp T. Comparison of FreeSurfer and CAT12 Software in Parcel-Based Cortical Thickness Calculations. *Brain Topogr.* 2022; doi: 10.1007/s10548-022-00919-8.

56. de Fátima Machado Dias M, Carvalho P, Castelo-Branco M, Duarte JV. Cortical Thickness in Brain Imaging Studies Using FreeSurfer and CAT12: A Matter of Reproducibility. *Neuroimage Rep.* 2022; doi: 10.1016/j.ynirp.2022.100137.

57. Seiger R, Ganger S, Kranz GS, Hahn A, Lanzenberger R. Cortical Thickness Estimations of FreeSurfer and the CAT12 Toolbox in Patients with Alzheimer's Disease and Healthy Controls. *J Neuroimaging.* Wiley; 2018; doi: 10.1111/JON.12521.

58. Velázquez J, Mateos J, Pasaye EH, Barrios FA, Marquez-Flores JA. Cortical Thickness Estimation: A Comparison of FreeSurfer and Three Voxel-Based Methods in a Test-Retest Analysis and a Clinical Application. *Brain Topogr.* 2021; doi: 10.1007/s10548-021-00852-2.

59. Righart R, Schmidt P, Dahnke R, Biberacher V, Beer A, Buck D, et al. Volume versus surface-based cortical thickness measurements: A comparative study with healthy controls and multiple sclerosis patients. *PLoS One.* 2017; doi: 10.1371/journal.pone.0179590.

60. Krzysztof G, Jean-Baptiste P, David K, B N, Tibor A, R C, et al. Brain Imaging Data Structure - a new standard for describing and organizing human neuroimaging data. *Front Neurosci.* Frontiers Media S.A.; 2015; doi: 10.3389/CONF.FNINS.2015.91.00056.

61. UK Biobank. <https://www.ukbiobank.ac.uk>

62. ENIGMA. <https://enigma.ini.usc.edu>

63. ADNI Database. <http://adni.loni.usc.edu>

64. ADNI. <http://www.adni-info.org>

65. Neuromorphometrics. <http://neuromorphometrics.com>
66. Benjamini Y, Hochberg Y. Controlling the false discovery rate: a practical and powerful approach to multiple testing. *J R Stat Soc Ser B Methodol*. JSTOR; :289–300 1995;
67. Foundation for the National Institutes of Health. <http://www.fnih.org>
68. Gaser C, Luders E, Kurth F, Thompson PM, Dahnke R. Supporting data for “CAT – A Computational Anatomy Toolbox for the Analysis of Structural MRI Data.” GigaScience Database;
69. CAT12 Github. <https://github.com/ChristianGaser/cat12>
70. FSL User Guide. <https://fsl.fmrib.ox.ac.uk/fsl/fslwiki/FSLVBM/UserGuide>
71. CBRAIN. <https://portal.cbrain.mcgill.ca>
72. Ashburner J, Ridgway GR. Symmetric diffeomorphic modeling of longitudinal structural MRI. *Front Neurosci*. Frontiers Media S.A.; 2012; doi: 10.3389/FNINS.2012.00197.
73. Reuter M, Rosas HD, Fischl B. Highly accurate inverse consistent registration: a robust approach. *NeuroImage*. Elsevier; 2010; doi: 10.1016/J.NEUROIMAGE.2010.07.020.
74. Reuter M, Fischl B. Avoiding asymmetry-induced bias in longitudinal image processing. *NeuroImage*. 2011; doi: 10.1016/j.neuroimage.2011.02.076.
75. Broessner G, Ellerbrock I, Menz MM, Frank F, Verius M, Gaser C, et al. Repetitive T1 Imaging Influences Gray Matter Volume Estimations in Structural Brain Imaging. *Front Neurol*. 2021; doi: 10.3389/fneur.2021.755749.
76. Taubert M, Mehnert J, Pleger B, Villringer A. Rapid and specific gray matter changes in M1 induced by balance training. *NeuroImage*. 2016; doi: 10.1016/j.neuroimage.2016.03.017.
77. Dahnke R, Gaser C. Surface and Shape Analysis. *Brain Morphometry*. Springer New York;
78. Tucholka A, Fritsch V, Poline J-B, Thirion B. An empirical comparison of surface-based and volume-based group studies in neuroimaging. *NeuroImage*. 2012; doi: 10.1016/j.neuroimage.2012.06.019.
79. Eklund A, Nichols TE, Knutsson H. Cluster failure: Why fMRI inferences for spatial extent have inflated false-positive rates. *Proc Natl Acad Sci*. National Academy of Sciences (NAS); 2016; doi: 10.1073/PNAS.1602413113.
80. Hayasaka S, Phan KL, Liberzon I, Worsley KJ, Nichols TE. Nonstationary cluster-size inference with random field and permutation methods. *NeuroImage*. Elsevier; 2004; doi: 10.1016/J.NEUROIMAGE.2004.01.041.
81. Salimi-Khorshidi G, Smith SM, Nichols TE. Adjusting the effect of nonstationarity in cluster-based and TFCE inference. *NeuroImage*. Elsevier; 2010; doi: 10.1016/J.NEUROIMAGE.2010.09.088.
82. LPBA40 Atlas. [http://www.loni.usc.edu/atlas/Atlas\\_Detail.php?atlas\\_id=12](http://www.loni.usc.edu/atlas/Atlas_Detail.php?atlas_id=12)
83. Cobra. <http://cobralab.ca>
84. Amaral RSC, Park MTM, Devenyi GA, Lynn V, Pipitone J, Winterburn J, et al. Manual segmentation of the fornix, fimbria, and alveus on high-resolution 3T MRI: Application via fully-automated mapping of the human memory circuit white and grey matter in healthy and pathological aging. *NeuroImage*. Elsevier; 2016; doi: 10.1016/J.NEUROIMAGE.2016.10.027.
85. Park MTM, Pipitone J, Baer LH, Winterburn JL, Shah Y, Chavez S, et al. Derivation of high-resolution MRI atlases of the human cerebellum at 3T and segmentation using multiple automatically generated templates. *NeuroImage*. Elsevier; 2014; doi: 10.1016/J.NEUROIMAGE.2014.03.037.

86. Treadway MT, Waskom ML, Dillon DG, Holmes AJ, Park MTM, Chakravarty MM, et al. Illness progression, recent stress, and morphometry of hippocampal subfields and medial prefrontal cortex in major depression. *Biol Psychiatry*. Elsevier; 2014; doi: 10.1016/J.BIOPSYCH.2014.06.018.
87. Tullo S, Devenyi GA, Patel R, Park MTM, Collins DL, Chakravarty MM. Warping an atlas derived from serial histology to 5 high-resolution MRIs. *Sci Data*. Springer Nature; 2018; doi: 10.1038/SDATA.2018.107.
88. Winterburn JL, Pruessner JC, Chavez S, Schira MM, Lobaugh NJ, Voineskos AN, et al. A novel in vivo atlas of human hippocampal subfields using high-resolution 3 T magnetic resonance imaging. *NeuroImage*. Elsevier; 2013; doi: 10.1016/J.NEUROIMAGE.2013.02.003.
89. Mori Atlas. [http://wiki.slicer.org/slicerWiki/index.php/Slicer3:Mori-Atlas\\_labels](http://wiki.slicer.org/slicerWiki/index.php/Slicer3:Mori-Atlas_labels)
90. Oishi K, Faria A, Jiang H, Li X, Akhter K, Zhang J, et al. Atlas-based whole brain white matter analysis using large deformation diffeomorphic metric mapping: application to normal elderly and Alzheimer's disease participants. *Neuroimage*. 2009; doi: 10.1016/j.neuroimage.2009.01.002.
91. IBSR. <http://www.nitrc.org/projects/ibsr>
92. Hammers A, Allom R, Koeppe MJ, Free SL, Myers R, Lemieux L, et al. Three-dimensional maximum probability atlas of the human brain, with particular reference to the temporal lobe. *Hum Brain Mapp*. 19:224–472003;
93. Hammers Atlas. <http://brain-development.org/brain-atlases/adult-brain-atlases/individual-adult-brain-atlases-new>
94. Eickhoff SB, Stephan KE, Mohlberg H, Grefkes C, Fink GR, Amunts K, et al. A new SPM toolbox for combining probabilistic cytoarchitectonic maps and functional imaging data. *NeuroImage*. Elsevier; 2005; doi: 10.1016/J.NEUROIMAGE.2004.12.034.
95. JuBrain Atlas. <https://github.com/inm7/jubrain-anatomy-toolbox>
96. Amunts K, Mohlberg H, Bludau S, Zilles K. Julich-Brain: A 3D probabilistic atlas of the human brain's cytoarchitecture. *Science*. American Association for the Advancement of Science; 2020; doi: 10.1126/SCIENCE.ABB4588.
97. Julich Brain Atlas. <https://kg.ebrains.eu/search/instances/Dataset/3fde2768-e845-4fc3-a425-61e2c1fb6db7>
98. Rolls ET, Huang C-C, Lin C-P, Feng J, Joliot M. Automated anatomical labelling atlas 3. *NeuroImage*. Elsevier; 2019; doi: 10.1016/J.NEUROIMAGE.2019.116189.
99. Tzourio-Mazoyer N, Landeau B, Papathanassiou D, Crivello F, Etard O, Delcroix N, et al. Automated anatomical labeling of activations in SPM using a macroscopic anatomical parcellation of the MNI MRI single-subject brain. *NeuroImage*. Elsevier; 2002; doi: 10.1006/NIMG.2001.0978.
100. AAL Atlas. <http://www.gin.cnrs.fr/en/tools/aal>
101. Najdenovska E, Alemán-Gómez Y, Battistella G, Descoteaux M, Hagmann P, Jacquemont S, et al. In-vivo probabilistic atlas of human thalamic nuclei based on diffusion-weighted magnetic resonance imaging. *Sci Data*. Springer Nature; 2018; doi: 10.1038/SDATA.2018.270.
102. Thalamus Nuclei Atlas. <https://wp.unil.ch/mial/probabilistic-atlas-of-thalamic-nuclei>
103. Saranathan M, Iglehart C, Monti M, Tourdias T, Rutt B. In vivo high-resolution structural MRI-based atlas of human thalamic nuclei. *Sci Data*. Springer Nature; 2021; doi: 10.1038/S41597-021-01062-Y.

104. Thalamic Nuclei Atlas. [https://github.com/thalamicseg/thomas\\_new](https://github.com/thalamicseg/thomas_new)
105. Tian Y, Margulies DS, Breakspear M, Zalesky A. Topographic organization of the human subcortex unveiled with functional connectivity gradients. *Nat Neurosci*. Springer Nature; 2020; doi: 10.1038/S41593-020-00711-6.
106. Melbourne Subcortical Atlas. <https://github.com/yetianmed/subcortex>
107. Diedrichsen J, Balsters J, Flavell J, Cussans E, Ramnani N. A probabilistic MR atlas of the human cerebellum. *NeuroImage*. Elsevier; 2009; doi: 10.1016/S1053-8119(09)71166-8.
108. SUIT Atlas. [https://github.com/DiedrichsenLab/cerebellar\\_atlases](https://github.com/DiedrichsenLab/cerebellar_atlases)
109. DK40 Atlas. <https://surfer.nmr.mgh.harvard.edu/fswiki/CorticalParcellation>
110. Destrieux C, Fischl B, Dale A, Halgren E. A sulcal depth-based anatomical parcellation of the cerebral cortex. *NeuroImage*. 2009; doi: 10.1016/S1053-8119(09)71561-7.
111. Destrieux Atlas. <https://surfer.nmr.mgh.harvard.edu/fswiki/DestrieuxAtlasChanges>
112. Glasser MF, Coalson TS, Robinson EC, Hacker CD, Harwell J, Yacoub E, et al. A multi-modal parcellation of human cerebral cortex. *Nature*. Nature Research; 2016;
113. HCP Atlas. <https://balsa.wustl.edu/study/RVVG>
114. Schaefer A, Kong R, Gordon EM, Laumann TO, Zuo X-N, Holmes AJ, et al. Local-Global Parcellation of the Human Cerebral Cortex from Intrinsic Functional Connectivity MRI. *Cereb Cortex*. Oxford University Press; 2018; doi: 10.1093/CERCOR/BHX179.
115. Local-Global Atlas.  
[https://github.com/ThomasYeoLab/CBIG/tree/master/stable\\_projects/brain\\_parcellation/Schaefer2018\\_LocalGlobal](https://github.com/ThomasYeoLab/CBIG/tree/master/stable_projects/brain_parcellation/Schaefer2018_LocalGlobal)
