# Supplementary material for: CAT: a computational anatomy toolbox for the analysis of structural MRI data
Source: PubMed Central journal article supplement (PMC11299546; doi:10.1093/gigascience/giae049), 2024-08-05
Supplement: giae049_response_to_reviewer_comments_revision_2.pdf [file giae049_response_to_reviewer_comments_revision_2.pdf]

## **Author's Response To Reviewer Comments**

I hope that we have now everything included from your requests.
